# Supplementary material
Source: publisher figshare collection journal article supplement (https://tandf.figshare.com/ndownloader/files/24420864)
Supplement: Supplementary file 1 [file 24420864]

## Sheet: cover
Data Report
Vegacenter
Swedish Museum of Natural History
Project leader:	Olof Martinsson
Project:	Vein- and mineralization paragenesis of the Liikavaara Cu-(W) deposit, northern Sweden – a key to its origin
Affiliation:	Luleå TU, Division of Geosciences and Environmental Engineering
Date:	14.04.2016
	Instrument Setting
	Mass spectrometer	Nu plasma (II) MC-ICP-MS
	Cooling gas flow rate	13 L/min
	Aux gas flow rate	0.93 L/min
	Mass resolution	low
	Cones	common Ni cones
	Torch	glass
	Laser ablation	ESI NWR193 ArF eximer based laser ablation system
	Ar flow rate (Mix Gas)	0.72 L/min
	He flow rate	0.32 L/min
	Ablation
	frequency	8 Hz
	spotsize	15 µm
	fluence	2.3 J/cm2
	Data collection
	washout time	25 s
	ablation time	35 s
	integration time	0.4 s
Naturhistoriska Riksmuseet
Postadress:		Besöksadress:				Telefon: 08-519 540 00
Box 50007		Frescativägen 40				registrator@nrm.se
104 05 Stockholm		114 18 Stockholm

## Sheet: first run
	All isotope ratios reported are normalised to the 91500 Zircon bracketing standard (drift and accuracy correction)
	Age: 1065 Ma (M. Wiedenbeck et al., Geostandards Newsletter, 19 (1995))
	first run
	Grain	sampling time (sec)	isotope ratios							ages						Common Pb 206Pb/204Pb
			207Pb/235U	prop 2SE	206Pb/238U	prop 2SE	Error Corr.	207Pb/206Pb	prop 2SE	207Pb/235U	prop 2SE	206Pb/238U	prop 2SE	207Pb/206Pb	prop 2SE
	Sample	X4A_9
	2**	18.8	1.206	0.084	0.1049	0.0048	0.9947	0.0834	0.0018	1279	43	795	36	643	28	4046
	3**	14.8	1.466	0.06	0.1235	0.0037	0.98869	0.0869	0.0012	1357	27	915	25	751	21	2588
	4	30	2.28	0.28	0.162	0.016	0.99359	0.1008	0.0032	1164	88	961	88	1625	61	13254
	5	17.2	0.634	0.029	0.0701	0.0014	0.91714	0.0656	0.0019	498	18	436.6	8.5	785	60	24375
	6**	10.8	0.957	0.03	0.0911	0.002	0.99934	0.07645	0.00092	1107	24	682	15	561.9	12	3926
	7	30.8	5.246	0.081	0.3296	0.0046	0.84689	0.11525	0.00059	1860.2	13	1836.4	22	1883.7	4.8	5402500
	8*	nA	nA	nA	nA	nA	nA	nA	nA	nA	nA	nA	nA	nA	nA	nA
	9_1**	6	1.377	0.082	0.1125	0.0038	0.96552	0.087	0.0017	1359	39	877	35	687	22	2585
	9_2	16.8	5.351	0.078	0.3354	0.0045	0.85042	0.1145	0.00055	1877	13	1864.5	22	1872	3.6	10033
	10**	30.4	4.357	0.11	0.2784	0.0049	0.94118	0.11377	0.00042	1860.3	6.7	1703.7	22	1583	25	1600
	11_1	30.8	1.97	0.12	0.1444	0.0064	0.99639	0.0979	0.0017	1100	41	869	36	1583	32	8473
	11_2**	30	4.599	0.092	0.2912	0.0053	0.94278	0.11541	0.00098	1886.2	15	1748	17	1647	26	1170
	12_1*	nA	nA	nA	nA	nA	nA	nA	nA	nA	nA	nA	nA	nA	nA	nA
	12_2	31.3	5.192	0.08	0.3305	0.0046	0.86325	0.11454	0.00058	1851.2	13	1840.8	22	1872.6	4.6	9786
	14*	nA	nA	nA	nA	nA	nA	nA	nA	nA	nA	nA	nA	nA	nA	nA
	16	30.8	5.324	0.08	0.3391	0.0045	0.94155	0.11463	0.00052	1872.7	13	1882.5	22	1874.1	2.4	<DL
	17*	nA	nA	nA	nA	nA	nA	nA	nA	nA	nA	nA	nA	nA	nA	nA
	18**	30.4	0.808	0.038	0.0814	0.0024	0.97692	0.0726	0.0013	1000	35	600	21	504	15	1708
	19	31.2	5.265	0.08	0.3327	0.0045	0.8882	0.11461	0.00055	1863.2	13	1851.5	22	1873.7	3.6	<DL
	20_1*	nA	nA	nA	nA	nA	nA	nA	nA	nA	nA	nA	nA	nA	nA	nA
	20_2	27.6	5.316	0.081	0.3363	0.0045	0.88685	0.11459	0.00056	1871.3	13	1868.8	22	1873.3	3.8	<DL
	21	30.8	5.285	0.083	0.3351	0.0045	0.90866	0.11475	0.0006	1866.4	13	1862.9	22	1876	5	59375
	22*	nA	nA	nA	nA	nA	nA	nA	nA	nA	nA	nA	nA	nA	nA	nA
	23	nA	nA	nA	nA	nA	nA	nA	nA	nA	nA	nA	nA	nA	nA	nA
	24**	14.8	0.75	0.025	0.0783	0.0015	0.97546	0.0705	0.0013	939	38	567	15	485.7	9.1	1656
	25**	6.7	0.767	0.046	0.0794	0.0029	0.99551	0.0706	0.0015	944	44	577	26	493	17	2791
	26**	12	4.75	0.28	0.3152	0.0076	0.97591	0.1135	0.0011	1856	18	1775	50	1766	37	353
	27**	31.6	1.107	0.046	0.1006	0.0027	0.98663	0.08	0.0013	1198	32	757	22	618	16	2625
	28**	24.8	0.583	0.022	0.068	0.0013	0.27946	0.0635	0.0028	706	89	466	14	424.1	8.1	1370
	29**	30.8	5.136	0.14	0.3249	0.0045	0.57063	0.11401	0.0013	1864	21	1841.9	24	1813.4	22	6178
	*	IC trip
	**	conventional common Pb correction applied (for samples with 206Pb/204Pb < 7000: Vizual Age: Petrus J.A. and Kamber B.S. (2012), Geostandards and Geoanalytical Research, 36, 247–270)
	Bracketing Standard 91500
	spot	sampling time (sec)	isotope ratios							ages						Common Pb 206Pb/204Pb
			207Pb/235U	prop 2SE	206Pb/238U	prop 2SE	Error Corr.	207Pb/206Pb	prop 2SE	207Pb/235U	prop 2SE	206Pb/238U	prop 2SE	207Pb/206Pb	prop 2SE
	1	30	1.849	0.031	0.17768	0.0021	0.46784	0.07518	0.00058	1062.9	11	1054.3	11	1073	15	2800
	2	30.4	1.847	0.031	0.18	0.0021	0.49369	0.07441	0.00056	1062.1	11	1067	12	1052	15	3363
	3	30	1.85	0.03	0.17949	0.0022	0.47161	0.07507	0.0006	1063.7	11	1064.2	12	1071	16	<DL
	4	30	1.853	0.031	0.17971	0.0021	0.612	0.07487	0.00059	1064.1	11	1065.4	12	1066	16	1333
	5	30	1.855	0.032	0.18014	0.0021	0.6156	0.07513	0.00062	1065	11	1067.7	12	1073	16	876
	6	30	1.851	0.03	0.17957	0.0021	0.44011	0.07478	0.00062	1063.5	11	1064.6	11	1062	17	<DL
	7	30	1.843	0.03	0.17778	0.0021	0.40619	0.07535	0.00059	1061.2	11	1054.8	11	1080	15	<DL
	8	30	1.856	0.031	0.17999	0.0022	0.4734	0.07484	0.00061	1065.8	11	1066.9	12	1063	17	2458
	9	30.4	1.864	0.031	0.17968	0.0021	0.38233	0.07467	0.00061	1068.1	11	1065.2	12	1059	16	<DL
	10	30.4	1.839	0.03	0.17784	0.0021	0.38837	0.0745	0.00061	1059.2	11	1055.2	12	1054	16	<DL
	11	30	1.851	0.031	0.17769	0.0021	0.49996	0.07486	0.00063	1063.5	11	1054.3	11	1065	17	<DL
	12	30.4	1.845	0.031	0.179	0.0021	0.42156	0.07462	0.00065	1061.9	11	1061.5	11	1057	18	<DL
	13	30	1.846	0.031	0.17945	0.0021	0.55497	0.07472	0.00063	1061.8	11	1063.9	12	1062	17	<DL
	14	30	1.862	0.031	0.18056	0.0021	0.52117	0.07507	0.0006	1067.6	11	1070	12	1073	17	<DL
	15	30	1.848	0.03	0.17993	0.0021	0.52635	0.07479	0.00057	1062.5	11	1066.6	12	1062	15	<DL
	16	30	1.851	0.03	0.1798	0.0021	0.37523	0.07519	0.0006	1063.8	11	1065.9	11	1073	16	<DL
	17	30	1.849	0.032	0.17937	0.0021	0.40903	0.07514	0.00064	1063	11	1063.5	11	1073	16	<DL
	18	30	1.844	0.031	0.17902	0.0021	0.58652	0.07455	0.00056	1061.2	11	1061.6	12	1056	15	<DL
	19	30	1.855	0.03	0.17942	0.0021	0.36464	0.07481	0.00066	1065	11	1063.8	12	1062	18	<DL
	20	30	1.85	0.031	0.17821	0.0022	0.57539	0.07504	0.0006	1063.7	11	1057.2	12	1070	16	1929
	21	30	1.848	0.03	0.17947	0.0021	0.51047	0.07475	0.00064	1063.2	11	1064.1	12	1061	17	<DL
	22	30	1.841	0.032	0.17829	0.0022	0.55559	0.07488	0.00064	1060	11	1057.6	12	1064	17	<DL
	23	30	1.859	0.031	0.17963	0.0021	0.4311	0.07481	0.0006	1066.5	11	1064.9	12	1062	16	3748
	24	30	1.847	0.031	0.17711	0.0021	0.4888	0.07508	0.00059	1062.9	11	1051.1	12	1070	16	1790
	25	30	1.815	0.032	0.1766	0.0024	0.75842	0.07432	0.00055	1050.4	11	1048.4	13	1053	16	<DL
	26	30	1.872	0.031	0.18023	0.0021	0.47564	0.07531	0.0006	1070.9	11	1068.2	12	1077	16	4588
	27	30	1.858	0.03	0.18049	0.0021	0.56468	0.07497	0.00053	1066.2	11	1069.6	11	1067.2	14	<DL
	28	30	1.836	0.031	0.17822	0.0021	0.50255	0.07509	0.00059	1058.3	11	1057.2	11	1070	16	<DL
	Average		1.84943		0.179085			0.0748857		1063.14		1061.95		1065.36
	2SD		0.0204934		0.00213532			0.000528181		7.35561		11.6721		14.823
	%RSD		1.10809		1.19235			0.705317		0.691874		1.09912		1.39136
	Secondary Standard GJI
	spot	sampling time (sec)	isotope ratios							ages						Common Pb 206Pb/204Pb
			207Pb/235U	prop 2SE	206Pb/238U	prop 2SE	Error Corr.	207Pb/206Pb	prop 2SE	207Pb/235U	prop 2SE	206Pb/238U	prop 2SE	207Pb/206Pb	prop 2SE
	1	31.2	0.7912	0.013	0.09597	0.0011	0.61488	0.05985	0.0004	591.8	7.2	590.7	6.6	597.6	14	6627
	2	30.8	0.7411	0.013	0.08964	0.0012	0.81838	0.05999	0.00043	563.4	7.6	553.4	7.1	602	15	<DL
	3	31.2	0.762	0.013	0.09136	0.0012	0.80742	0.06004	0.0004	575.4	7.3	563.6	7	604.4	15	<DL
	4	30.8	0.7488	0.013	0.08991	0.0012	0.83818	0.05989	0.00041	567.4	7.7	555	7.1	599	15	<DL
	Average		0.7488		0.08991			0.05989		574.5		565.675		600.75
	2SD		0.0440861		0.00586454			0.000175404		25.1322		34.5483		6.0959
	%RSD		5.88757		6.52268			0.292877		4.37462		6.10744		1.01471
	Secondary Standard Plesovice
	spot	sampling time (sec)	isotope ratios							ages						Common Pb 206Pb/204Pb
			207Pb/235U	prop 2SE	206Pb/238U	prop 2SE	Error Corr.	207Pb/206Pb	prop 2SE	207Pb/235U	prop 2SE	206Pb/238U	prop 2SE	207Pb/206Pb	prop 2SE
	1	32	0.3887	0.0063	0.05362	0.00062	0.61254	0.05299	0.00037	333.4	4.6	336.7	3.8	328	16	13167
	2	32	0.3971	0.0063	0.05428	0.00062	0.51653	0.05343	0.00036	339.5	4.6	340.7	3.8	346.5	15	<DL
	Average		0.3929		0.05395			0.05321		336.45		338.7		337.25
	2SD		0.0118794		0.000933381			0.000622254		8.6267		5.65685		26.163
	%RSD		3.02352		1.73009			1.16943		2.56404		1.67017		7.75773
	Secondary Standard Temora
	spot	sampling time (sec)	isotope ratios							ages						Common Pb 206Pb/204Pb
			207Pb/235U	prop 2SE	206Pb/238U	prop 2SE	Error Corr.	207Pb/206Pb	prop 2SE	207Pb/235U	prop 2SE	206Pb/238U	prop 2SE	207Pb/206Pb	prop 2SE
	1	30.8	0.5094	0.0082	0.06646	0.00076	0.19801	0.05506	0.00046	418	5.5	414.8	4.6	414	18	7827
	2	31.2	0.5179	0.0086	0.0671	0.00077	0.092602	0.05542	0.00049	423.7	5.8	418.7	4.6	428	20	<DL
	3	30.8	0.5015	0.0083	0.06587	0.00077	0.31855	0.05538	0.00046	412.6	5.6	411.2	4.7	428	19	<DL
	4	27.2	0.4974	0.0083	0.06545	0.00075	0.43443	0.05502	0.00046	409.9	5.7	408.7	4.5	412	19	<DL
	Average		0.4974		0.06545			0.05502		416.05		413.35		420.5
	2SD		0.018117		0.00143638			0.00041825		12.2229		8.7155		17.3973
	%RSD		3.64235		2.19463			0.760179		2.93785		2.1085		4.13729

## Sheet: second run
	All isotope ratios reported are normalised to the 91500 Zircon bracketing standard (drift and accuracy correction)
	Age: 1065 Ma (M. Wiedenbeck et al., Geostandards Newsletter, 19 (1995))
	second run
	Grain	sampling time (sec)	isotope ratios							ages						Common Pb 206Pb/204Pb
			207Pb/235U	prop 2SE	206Pb/238U	prop 2SE	Error Corr.	207Pb/206Pb	prop 2SE	207Pb/235U	prop 2SE	206Pb/238U	prop 2SE	207Pb/206Pb	prop 2SE
	Sample	X4A_9
	18	5.7443	5.083	0.057	0.3233	0.0039	0.9434	0.1158	0.00096	1833.2	9.5	1806	19	1892.4	15	13254
	30_1	20.823	5.297	0.11	0.3372	0.0065	0.99494	0.11398	0.00095	1867	19	1872	32	1863.8	15	34667
	30_2	31.594	3.406	0.081	0.2225	0.005	0.98465	0.11012	0.0011	1506	18	1297	26	1800.8	17	7552
	31_1*	nA	nA	nA	nA	nA	nA	nA	nA	nA	nA	nA	nA	nA	nA	nA
	31_2**	23.133	1.087	0.036	0.0979	0.0027	0.91778	0.1021	0.0012	748	18	604	15	1660	23	92
	32**	3.9943	0.909	0.028	0.0887	0.002	0.94614	0.0767	0.0012	657	15	548	12	1113	30	1614
	34**	5.4343	4.421	0.062	0.2852	0.0036	0.91322	0.1141	0.00062	1716.2	12	1618	18	1865.6	9.8	5269
	35	22.099	4.08	0.13	0.2552	0.0081	0.99593	0.11639	0.00096	1647	25	1463	41	1901.5	15	9009
	36_1	30.432	5.346	0.055	0.3367	0.0036	0.86838	0.11515	0.00096	1876.2	8.8	1870.7	17	1882.1	15	<DL
	36_2**	22.438	2.04	0.044	0.1572	0.0031	0.96189	0.09502	0.00088	1129	15	941	17	1528	18	4768
	36_3**	10.471	3.197	0.057	0.2149	0.0034	0.98206	0.10942	0.00087	1456	14	1255	18	1789.7	14	3252
	41_1	9.349	1.79	0.12	0.1365	0.0066	0.99849	0.0966	0.002	1039	45	824	38	1557	40	8884
	41_2	13.463	5.449	0.096	0.3468	0.0059	0.98841	0.11456	0.001	1892	15	1919	28	1872.8	16	16854
	42**	10.807	4.43	0.13	0.2916	0.0044	0.73387	0.1131	0.0036	1717	25	1649	22	1854	62	568
	49**	7.3228	2.986	0.088	0.1934	0.005	0.98764	0.11457	0.0017	1403	22	1139	27	1873.1	26	1240
	50	12.333	4.357	0.062	0.2765	0.0037	0.96617	0.11521	0.00097	1703.9	12	1574	19	1883.1	15	12111
	51	11.177	5.588	0.06	0.3568	0.004	0.84381	0.11491	0.00099	1914.2	9.2	1966.8	19	1878.3	16	13457
	53**	11.982	5.474	0.12	0.3498	0.0047	0.72556	0.1137	0.0016	1896	18	1933.7	23	1858	25	4388
	55	22.972	5.106	0.056	0.3236	0.0038	0.85498	0.11509	0.00098	1837	9.3	1807.4	18	1881.2	15	7490
	56	31.2	5.284	0.052	0.33435	0.0035	0.81008	0.11462	0.00094	1866.2	8.4	1860	17	1873.8	15	<DL
	59*	nA	nA	nA	nA	nA	nA	nA	nA	nA	nA	nA	nA	nA	nA	nA
	60_1**	21.003	5.149	0.061	0.3275	0.0038	0.91837	0.11486	0.00058	1844	10	1826.3	18	1877.6	9.1	5154
	60_2**	16.485	2.307	0.056	0.1674	0.0031	0.97579	0.1017	0.0005	1214	17	998	17	1655.2	9.1	1045
	61	nA	nA	nA	nA	nA	nA	nA	nA	nA	nA	nA	nA	nA	nA	nA
	62	15.569	5.245	0.081	0.3294	0.006	0.94263	0.11652	0.001	1859	13	1835	29	1903.4	16	17097
	63	5.1897	5.264	0.067	0.3377	0.0043	0.8559	0.11526	0.0011	1863	11	1875	21	1883.8	17	<DL
	64*	nA	nA	nA	nA	nA	nA	nA	nA	nA	nA	nA	nA	nA	nA	nA
	66**	13.127	2.95	0.11	0.2055	0.0066	0.99489	0.10584	0.00074	1399	26	1204	35	1728.7	13	2468
	68**	18.622	3.85	0.06	0.2478	0.0036	0.94307	0.11318	0.0013	1602.8	13	1427	19	1851	21	2712
	69_1	28.696	5.293	0.059	0.334	0.004	0.93047	0.11494	0.00095	1867.5	9.5	1858	19	1878.8	15	15789
	69_2	13.432	4.215	0.049	0.2737	0.0036	0.9397	0.11324	0.00074	1676.8	9.4	1559	18	1851.9	12	2464
	*	IC trip
	**	conventional common Pb correction applied (for samples with 206Pb/204Pb < 7000: Vizual Age: Petrus J.A. and Kamber B.S. (2012), Geostandards and Geoanalytical Research, 36, 247–270)
	Bracketing Standard 91500
	spot	sampling time (sec)	isotope ratios							ages						Common Pb 206Pb/204Pb
			207Pb/235U	prop 2SE	206Pb/238U	prop 2SE	Error Corr.	207Pb/206Pb	prop 2SE	207Pb/235U	prop 2SE	206Pb/238U	prop 2SE	207Pb/206Pb	prop 2SE
	1	29.6	1.84	0.024	0.17999	0.002	0.43738	0.07443	0.0008	1059.6	8.6	1066.9	11	1052	22	<DL
	2	30	1.863	0.023	0.17837	0.0019	0.5829	0.07544	0.00075	1067.7	8.2	1058.1	10	1079	20	<DL
	3	30	1.846	0.022	0.17818	0.002	0.4885	0.07513	0.00077	1061.6	7.8	1057	11	1071	20	3481
	4	30	1.866	0.022	0.1802	0.002	0.58457	0.07545	0.00074	1068.8	7.8	1068	11	1081	20	914
	5	30	1.836	0.023	0.17852	0.0019	0.52056	0.07449	0.00081	1058.8	8.2	1058.9	11	1057	21	<DL
	6	30	1.861	0.024	0.18042	0.002	0.60933	0.07501	0.00077	1067.8	8.2	1069.3	11	1068	21	<DL
	7	30	1.849	0.023	0.17955	0.002	0.60713	0.07447	0.00077	1063	8.3	1064.5	11	1053	21	<DL
	8	30	1.864	0.023	0.18039	0.002	0.51411	0.07494	0.0008	1069	8.4	1069.1	11	1070	21	3481
	9	27.475	1.848	0.021	0.17927	0.002	0.53942	0.07472	0.00072	1063.1	7.2	1062.9	11	1060	19	<DL
	10	30	1.853	0.022	0.18012	0.0021	0.55514	0.07463	0.00077	1065.2	7.4	1067.6	11	1058	21	<DL
	11	29.6	1.849	0.022	0.17988	0.002	0.59561	0.07496	0.00079	1062.8	7.7	1066.3	11	1066	21	<DL
	12	30	1.838	0.022	0.17726	0.0019	0.58828	0.07493	0.00079	1059.6	8.2	1052	11	1066	21	<DL
	13	29.6	1.842	0.022	0.1789	0.002	0.429	0.07458	0.00079	1061.1	7.7	1061	11	1058	22	<DL
	14	30	1.843	0.022	0.17923	0.002	0.65231	0.07448	0.00073	1060.8	7.9	1062.8	11	1054	20	<DL
	15	30	1.827	0.022	0.17742	0.002	0.4701	0.07472	0.00075	1055.1	7.8	1052.8	11	1062	20	<DL
	16	29.6	1.857	0.022	0.17953	0.0019	0.49342	0.0749	0.00078	1066.2	8.1	1064.4	11	1067	21	<DL
	17	30	1.841	0.022	0.17896	0.002	0.45667	0.0747	0.0008	1060	8	1061.2	11	1061	21	<DL
	18	30	1.856	0.023	0.17963	0.002	0.57926	0.07495	0.00079	1065.5	8.2	1064.9	11	1066	21	<DL
	19	29.6	1.844	0.022	0.17866	0.002	0.57453	0.07485	0.00074	1061.8	7.6	1059.6	11	1065	20	<DL
	20	30	1.865	0.022	0.17995	0.002	0.35416	0.07505	0.00082	1069.6	8.2	1066.7	11	1069	22	<DL
	21	30	1.847	0.025	0.1783	0.002	0.51115	0.07562	0.00082	1062.1	8.8	1057.7	11	1084	22	<DL
	22	29.6	1.848	0.023	0.1789	0.002	0.58127	0.07473	0.00078	1062.6	8.3	1060.9	11	1062	21	<DL
	23	30	1.844	0.021	0.17871	0.0019	0.26158	0.07453	0.00075	1061.7	7.6	1059.9	11	1055	20	<DL
	24	29.6	1.841	0.021	0.1789	0.0019	0.32604	0.07463	0.0008	1060	7.6	1060.9	11	1057	22	<DL
	25	29.6	1.859	0.023	0.17952	0.002	0.51474	0.07515	0.00079	1066.5	8.3	1064.3	11	1072	21	4363
	26	29.6	1.863	0.021	0.17893	0.002	0.37608	0.07559	0.00077	1067.7	7.5	1061.1	11	1083	20	3689
	27	29.6	1.859	0.024	0.18107	0.002	0.43754	0.0744	0.00081	1066.5	8.4	1072.8	11	1057	20	<DL
	28	30	1.85	0.023	0.17887	0.002	0.61974	0.07495	0.00075	1063.1	8.1	1060.8	11	1068	19	<DL
	Average		1.84996		0.179201			0.0748725		1063.47		1062.59		1065.04
	2SD		0.0201585		0.00178039			0.000693902		7.25894		9.73177		17.9339
	%RSD		1.08967		0.993515			0.926778		0.682568		0.915857		1.68388
	Secondary Standard GJI
	spot	sampling time (sec)	isotope ratios							ages						Common Pb 206Pb/204Pb
			207Pb/235U	prop 2SE	206Pb/238U	prop 2SE	Error Corr.	207Pb/206Pb	prop 2SE	207Pb/235U	prop 2SE	206Pb/238U	prop 2SE	207Pb/206Pb	prop 2SE
	1	30	0.8005	0.0087	0.0967	0.0011	0.44258	0.06001	0.00057	597.1	4.9	595	6.2	603	21	<DL
	2	30.4	0.7937	0.009	0.09644	0.0011	0.55594	0.05985	0.00055	593.5	5.2	593.5	6.2	597.6	20	<DL
	3	30	0.813	0.0088	0.0985	0.001	0.2585	0.05996	0.00058	604.1	4.9	605.6	6	603	21	<DL
	4	30.4	0.8089	0.0089	0.09762	0.001	0.35012	0.05991	0.00057	601.8	5	600.5	6.1	600	21	<DL
	Average		0.8089		0.09762			0.05991		599.125		598.65		600.9
	2SD		0.0172568		0.00187656			0.000136991		9.49719		11.0496		5.23068
	%RSD		2.13336		1.92231			0.228662		1.58518		1.84575		0.870474
	Secondary Standard Plesovice
	spot	sampling time (sec)	isotope ratios							ages						Common Pb 206Pb/204Pb
			207Pb/235U	prop 2SE	206Pb/238U	prop 2SE	Error Corr.	207Pb/206Pb	prop 2SE	207Pb/235U	prop 2SE	206Pb/238U	prop 2SE	207Pb/206Pb	prop 2SE
	1	30.8	0.3977	0.0043	0.05442	0.00057	0.52147	0.05306	0.00049	339.9	3.1	341.57	3.5	332	21	<DL
	2	31.2	0.4007	0.0044	0.05462	0.00057	0.53388	0.05324	0.00049	342.1	3.2	342.82	3.5	342.4	21	<DL
	Average		0.3992		0.05452			0.05315		341		342.195		337.2
	2SD		0.00424264		0.000282843			0.000254558		3.11127		1.76777		14.7078
	%RSD		1.06279		0.518787			0.478943		0.912396		0.516596		4.36175
	Secondary Standard Temora
	spot	sampling time (sec)	isotope ratios							ages						Common Pb 206Pb/204Pb
			207Pb/235U	prop 2SE	206Pb/238U	prop 2SE	Error Corr.	207Pb/206Pb	prop 2SE	207Pb/235U	prop 2SE	206Pb/238U	prop 2SE	207Pb/206Pb	prop 2SE
	1	30	0.5028	0.006	0.06696	0.00071	0.4338	0.05445	0.00056	413.5	4	417.8	4.3	391	22	<DL
	2	29.6	0.5108	0.0061	0.06712	0.00071	0.14784	0.05527	0.00059	419	4.1	418.8	4.3	427	25	100571
	3	24.4	0.5232	0.0078	0.06931	0.00099	0.7638	0.05492	0.00059	427.2	5.2	432	6	408	24	915.556
	4	29.6	0.5066	0.0061	0.06648	0.0007	0.14908	0.05531	0.00063	416.1	4.1	414.9	4.2	428	26	<DL
	Average		0.5066		0.06648			0.05531		418.95		420.875		413.5
	2SD		0.0177159		0.00251615			0.000797726		11.8822		15.1977		35.1947
	%RSD		3.49702		3.78483			1.44228		2.83619		3.61098		8.51141

## Sheet: third run
	All isotope ratios reported are normalised to the 91500 Zircon bracketing standard (drift and accuracy correction)
	Age: 1065 Ma (M. Wiedenbeck et al., Geostandards Newsletter, 19 (1995))
	third run
	Grain	sampling time (sec)	isotope ratios							ages						Common Pb 206Pb/204Pb
			207Pb/235U	prop 2SE	206Pb/238U	prop 2SE	Error Corr.	207Pb/206Pb	prop 2SE	207Pb/235U	prop 2SE	206Pb/238U	prop 2SE	207Pb/206Pb	prop 2SE
	Sample	X4A_9
	78**	8.8938	2.482	0.098	0.1871	0.0065	0.97213	0.0968	0.00094	1563	18	1265	29	1105	35	2960.87
	84	9.7808	5.312	0.12	0.3344	0.0073	0.96544	0.11581	0.00087	1870.7	20	1859	35	1892.4	13	16023.5
	88	13.347	5.443	0.12	0.3439	0.007	0.93461	0.1149	0.00085	1891.6	19	1905.6	34	1878.2	13	21069
	90	29.617	5.52	0.12	0.34817	0.0069	0.86336	0.1148	0.00083	1903.7	19	1925.8	33	1876.7	13	9020
	96*	nA	nA	nA	nA	nA	nA	nA	nA	nA	nA	nA	nA	nA	nA	nA
	98*	nA	nA	nA	nA	nA	nA	nA	nA	nA	nA	nA	nA	nA	nA	nA
	109	30.8	5.436	0.12	0.3436	0.0068	0.98531	0.11454	0.00084	1890.5	19	1903.9	33	1872.6	13	<DL
	110	13.747	5.389	0.13	0.3397	0.0073	0.96355	0.11517	0.00087	1882.7	20	1885	35	1882.5	14	<DL
	111	6.4201	0.544	0.018	0.0675	0.0015	0.95497	0.05806	0.00088	440.8	12	421	9.2	531	33	15852.5
	113**	28.82	1.87	0.14	0.133	0.0083	0.99461	0.1029	0.0016	1673	28	1061	52	814	49	558.73
	115	16.477	5.186	0.13	0.3281	0.0078	0.99213	0.11458	0.00083	1850	22	1829	38	1873.3	13	14699.1
	120	15.731	5.373	0.12	0.3378	0.0071	0.95926	0.11499	0.00084	1880.4	20	1876	34	1879.6	13	8071.43
	123	13.347	5.427	0.12	0.3452	0.0069	0.71985	0.11449	0.00094	1889.1	19	1911.7	33	1871.7	15	18752.2
	128	30.4	5.483	0.12	0.3458	0.0069	0.75089	0.11509	0.00088	1897.8	19	1914.3	33	1881.1	14	<DL
	134	7.8043	5.308	0.12	0.3329	0.0075	0.85832	0.11594	0.00094	1870	20	1853	36	1894.5	14	13918.2
	139	14.937	5.347	0.12	0.336	0.0068	0.71003	0.11522	0.00092	1876.4	19	1867.6	33	1883.2	14	<DL
	141	16.927	5.18	0.12	0.3273	0.0072	0.98439	0.11466	0.00083	1849	20	1825	35	1874.5	13	<DL
	143	6.211	5.252	0.12	0.331	0.0073	0.97261	0.11566	0.00087	1861	20	1843	35	1890.2	14	<DL
	*	no data available due to IC trip
	**	conventional common Pb correction applied (for samples with 206Pb/204Pb < 7000: Vizual Age: Petrus J.A. and Kamber B.S. (2012), Geostandards and Geoanalytical Research, 36, 247–270)
	Bracketing Standard 91500
	spot	sampling time (sec)	isotope ratios							ages						Common Pb 206Pb/204Pb
			207Pb/235U	prop 2SE	206Pb/238U	prop 2SE	Error Corr.	207Pb/206Pb	prop 2SE	207Pb/235U	prop 2SE	206Pb/238U	prop 2SE	207Pb/206Pb	prop 2SE
	1	30	1.849	0.037	0.17901	0.0031	0.52132	0.07488	0.00069	1063.6	13	1061.5	17	1065	19	3095
	2	30.4	1.847	0.037	0.17965	0.0032	0.53424	0.07469	0.00067	1062.1	13	1065	17	1061	18	<DL
	3	30	1.841	0.038	0.17854	0.0032	0.49536	0.07476	0.00074	1060.5	13	1059	17	1061	20	<DL
	4	30.4	1.849	0.038	0.17911	0.0031	0.52076	0.07499	0.00073	1062.8	13	1062.1	17	1067	20	<DL
	5	30	1.875	0.039	0.18142	0.0032	0.73615	0.07487	0.00074	1073	14	1074.7	18	1064	20	<DL
	6	30	1.864	0.038	0.18082	0.0032	0.5346	0.07486	0.0007	1068.2	13	1071.4	17	1068	20	<DL
	7	30.4	1.829	0.038	0.17752	0.0031	0.52009	0.07475	0.00073	1055.8	14	1053.4	17	1064	20	89500
	8	30	1.841	0.037	0.17702	0.0031	0.47132	0.0756	0.00072	1060	13	1050.7	17	1086	18	<DL
	9	30	1.857	0.038	0.17991	0.0032	0.45804	0.07509	0.00076	1065.8	14	1066.5	17	1070	20	<DL
	10	30	1.875	0.038	0.18199	0.0032	0.43824	0.07438	0.00073	1072.2	13	1077.8	17	1052	20	3009
	11	30.4	1.834	0.037	0.17766	0.0031	0.46396	0.07486	0.0007	1057.4	13	1054.2	17	1064	19	4388
	12	30	1.849	0.038	0.17858	0.0032	0.26654	0.07509	0.00078	1062.8	13	1059.2	17	1070	21	<DL
	13	30	1.861	0.037	0.17997	0.0032	0.35292	0.07502	0.00072	1067.2	13	1066.8	17	1068	19	<DL
	14	30.4	1.821	0.038	0.17705	0.0031	0.48987	0.07465	0.00077	1052.9	14	1050.8	17	1058	21	696
	15	30.4	1.831	0.037	0.17813	0.0031	0.36669	0.07479	0.00073	1056.9	13	1056.7	17	1062	20	<DL
	16	30	1.878	0.038	0.17996	0.0032	0.52697	0.07566	0.00072	1073.1	13	1066.7	17	1085	19	<DL
	17	30.4	1.856	0.037	0.17892	0.0032	0.30755	0.07522	0.00074	1065.2	13	1061	17	1073	20	<DL
	18	30	1.847	0.038	0.17948	0.0031	0.50299	0.07469	0.00076	1062.7	14	1064.1	17	1059	21	<DL
	19	30	1.844	0.037	0.17994	0.0032	0.53217	0.0744	0.00065	1061.1	13	1066.6	17	1052	18	4356
	Average		1.84989		0.179194			0.0749079		1063.33		1062.54		1065.74
	2SD		0.0318112		0.0027687			0.000665552		11.3973		15.1135		17.8493
	%RSD		1.71962		1.54509			0.888493		1.07185		1.4224		1.67483
	Secondary Standard GJI
	spot	sampling time (sec)	isotope ratios							ages						Common Pb 206Pb/204Pb
			207Pb/235U	prop 2SE	206Pb/238U	prop 2SE	Error Corr.	207Pb/206Pb	prop 2SE	207Pb/235U	prop 2SE	206Pb/238U	prop 2SE	207Pb/206Pb	prop 2SE
	1	30.4	0.8075	0.016	0.09729	0.0017	0.45355	0.06022	0.00052	601	8.9	598.5	9.9	611	19	<DL
	2	30.4	0.8096	0.016	0.09757	0.0017	0.33326	0.06015	0.00056	602.1	9.1	600.2	9.9	611	21	<DL
	Average		0.80855		0.09743			0.060185		601.55		599.35		611
	2SD		0.00296985		0.00039598			9.89949e-05		1.55563		2.40416		0
	%RSD		0.367305		0.406425			0.164484		0.258604		0.401128		0
	Secondary Standard Plesovice
	spot	sampling time (sec)	isotope ratios							ages						Common Pb 206Pb/204Pb
			207Pb/235U	prop 2SE	206Pb/238U	prop 2SE	Error Corr.	207Pb/206Pb	prop 2SE	207Pb/235U	prop 2SE	206Pb/238U	prop 2SE	207Pb/206Pb	prop 2SE
	1	30	0.3818	0.0075	0.05201	0.00092	0.57131	0.05317	0.00045	328.3	5.5	326.8	5.6	335	19	3009
	2	29.6	0.3798	0.0075	0.05193	0.0009	0.52191	0.05304	0.00045	326.8	5.5	326.4	5.5	330	19	4388
	Average		0.3808		0.05197			0.053105		327.55		326.6		332.5
	2SD		0.00282843		0.000113137			0.000183848		2.12132		0.565685		7.07107
	%RSD		0.742759		0.217697			0.346197		0.647633		0.173204		2.12664
	Secondary Standard Temora
	spot	sampling time (sec)	isotope ratios							ages						Common Pb 206Pb/204Pb
			207Pb/235U	prop 2SE	206Pb/238U	prop 2SE	Error Corr.	207Pb/206Pb	prop 2SE	207Pb/235U	prop 2SE	206Pb/238U	prop 2SE	207Pb/206Pb	prop 2SE
	1	30	0.5026	0.01	0.06663	0.0012	0.25339	0.05484	0.00055	413.4	6.9	415.8	7	404	23	<DL
	2	30	0.5101	0.01	0.06675	0.0012	0.15866	0.05553	0.00062	418.4	7	416.6	7	432	25	<DL
	Average		0.50635		0.06669			0.055185		415.9		416.2		418
	2SD		0.0106066		0.000169706			0.000975807		7.07107		1.13137		39.598
	%RSD		2.09472		0.254469			1.76825		1.70018		0.271833		9.4732

## Sheet: PlotDat15
Source sheet	all data	4.78	0.2939	200		600		1000		1400		1800		2200		0	0	0	0	0.217708	0.0315113	0	0.0381972	4.96358	0.305579	5.22858	0.324328	5.20134	0.325866	5.09855	0.321611	3.99925	0.253115	4.73925	0.298637	2.06373	0.134334	4.66327	0.293552	5.23315	0.328232	4.93597	0.31224	3.85701	0.247831	4.0977	0.262291	5.14086	0.324328
Plot name	Concordia12	5.127	0.3193	0.218107	0.0315113	0.807407	0.097544	1.6818	0.167804	2.97921	0.242562	4.90427	0.322105	7.76065	0.40674	0.0826367	0.0125848	0.0826367	0.0125629	0.805631	0.097544	9	0.540375	4.96004	0.305605	5.22662	0.32444	5.19803	0.325966	5.09701	0.32175	3.99407	0.252944	4.73405	0.298909	2.05807	0.134164	4.66102	0.293772	5.23102	0.328305	4.93007	0.312295	3.85206	0.247837	4.09562	0.262306	5.13803	0.324324
Plot Type	1	5.03	0.3146	0.218099	0.0315195	0.807373	0.0975701	1.68171	0.16785	2.97903	0.24263	4.90394	0.322199	7.76004	0.406863	0.172102	0.0253281	0.172102	0.0252837	1.67741	0.167804			4.94958	0.30518	5.22083	0.324354	5.18826	0.325629	5.09246	0.321669	3.97874	0.252121	4.71869	0.29857	2.04135	0.133296	4.65439	0.293764	5.22475	0.328166	4.91263	0.311647	3.83741	0.247234	4.08949	0.262062	5.12967	0.323992
1st free col	157	5.019	0.316	0.218076	0.0315273	0.807272	0.0975952	1.68147	0.167895	2.97851	0.242697	4.90295	0.32229	7.75825	0.406981	0.268961	0.0382317	0.268961	0.0381642	2.97009	0.242562			4.9326	0.304323	5.21143	0.324075	5.17241	0.324869	5.0851	0.32137	3.95385	0.250679	4.69378	0.297633	2.01419	0.131762	4.64363	0.293526	5.21456	0.327821	4.88433	0.310321	3.81364	0.246047	4.07952	0.261571	5.11609	0.323346
Sigma Level	2	3.73	0.236	0.218039	0.0315346	0.807107	0.0976184	1.68106	0.167936	2.97767	0.242758	4.90135	0.322373	7.75534	0.407089	0.373824	0.0512976	0.373824	0.0512066	4.8869	0.322105			4.90975	0.303064	5.19879	0.323612	5.15108	0.323713	5.07519	0.320864	3.92035	0.248673	4.66027	0.296133	1.97766	0.129624	4.62915	0.293067	5.20086	0.327283	4.84626	0.308368	3.78167	0.244319	4.06612	0.26085	5.09782	0.32241
Absolute Errs	TRUE	4.47	0.283	0.21799	0.0315409	0.806887	0.0976386	1.68051	0.167972	2.97654	0.242811	4.89919	0.322447	7.75143	0.407185	0.487352	0.064528	0.487352	0.0644129	7.72917	0.40674			4.88192	0.301454	5.18339	0.322983	5.1251	0.322208	5.06312	0.320171	3.87955	0.24618	4.61945	0.294128	1.93314	0.126961	4.61153	0.292407	5.18416	0.326572	4.79988	0.305862	3.74271	0.242118	4.0498	0.259927	5.07555	0.321219
Symbol Type	1	1.77	0.116	0.217929	0.0315461	0.806617	0.0976553	1.67985	0.168001	2.97516	0.242855	4.89655	0.322507	7.74666	0.407263	0.610262	0.077925	0.610262	0.077785	IsoLine	IsoLine			4.85018	0.299553	5.16582	0.322212	5.09547	0.32041	5.04936	0.319319	3.83299	0.243296	4.57288	0.291696	1.88235	0.123877	4.59142	0.29157	5.16511	0.325717	4.74697	0.302901	3.69826	0.239528	4.03117	0.258838	5.05016	0.319821
Inverse Plot	FALSE	4.547	0.2878	0.21786	0.03155	0.80631	0.0976676	1.67909	0.168023	2.97358	0.242888	4.89355	0.322551	7.74121	0.407321	0.743328	0.0914905	0.743328	0.0913251					4.81573	0.297435	5.14677	0.32133	5.06332	0.318389	5.03443	0.318338	3.78248	0.240131	4.52236	0.288929	1.82725	0.120491	4.5696	0.290587	5.14445	0.32475	4.68957	0.299598	3.65004	0.236649	4.01097	0.257624	5.02261	0.318268
Color Plot	TRUE	5.123	0.3228	0.217785	0.0315524	0.805977	0.0976753	1.67827	0.168037	2.97187	0.242908	4.89029	0.322579	7.73531	0.407357	0.887391	0.105227	0.887391	0.105035					4.77992	0.295181	5.12695	0.32037	5.02989	0.316222	5.01891	0.317268	3.72995	0.236807	4.46983	0.285935	1.76994	0.116932	4.54692	0.289498	5.12296	0.323707	4.62988	0.296079	3.5999	0.233591	3.98995	0.256333	4.99395	0.31662
3D plot	FALSE	4.63	0.294	0.217708	0.0315532	0.805631	0.0976778	1.67741	0.168041	2.97009	0.242915	4.8869	0.322588	7.72917	0.407369	1.04336	0.119136	1.04336	0.118918					4.74411	0.292878	5.10713	0.319368	4.99647	0.313993	5.00339	0.316149	3.67742	0.233453	4.4173	0.282828	1.71264	0.113337	4.52423	0.288343	5.10147	0.32263	4.57019	0.292481	3.54976	0.230472	3.96894	0.255013	4.9653	0.31494
Linear	FALSE	3.6	0.232	0.21763	0.0315524	0.805284	0.0976753	1.67655	0.168037	2.96832	0.242908	4.88351	0.322579	7.72303	0.407357	1.21222	0.13322	1.21222	0.132975					4.70967	0.290614	5.08808	0.318364	4.96433	0.311788	4.98847	0.315024	3.62691	0.230196	4.3668	0.279728	1.65754	0.109845	4.50243	0.287167	5.08081	0.321559	4.5128	0.288941	3.50155	0.227412	3.94874	0.253716	4.93775	0.313294
Data Range	D3:H68	3.99	0.2556	0.217555	0.03155	0.804951	0.0976676	1.67573	0.168023	2.96661	0.242888	4.88026	0.322551	7.71712	0.407321	1.39503	0.147481	1.39503	0.147208					4.67794	0.288477	5.07052	0.317396	4.93472	0.30969	4.97473	0.313937	3.58037	0.227163	4.32027	0.276753	1.60676	0.106589	4.48234	0.286016	5.06177	0.320536	4.45991	0.285595	3.45713	0.224528	3.93013	0.252492	4.91237	0.311744
Filled Symbols	TRUE	4.994	0.3158	0.217486	0.0315461	0.804644	0.0976553	1.67497	0.168001	2.96503	0.242855	4.87725	0.322507	7.71168	0.407263	1.59294	0.161922	1.59294	0.16162					4.65013	0.286547	5.05513	0.316501	4.90877	0.307781	4.96269	0.312929	3.53957	0.224469	4.27949	0.274018	1.56226	0.103695	4.46473	0.284933	5.04508	0.3196	4.41356	0.282573	3.41819	0.221931	3.91381	0.251387	4.89012	0.31035
ConcAge	FALSE	3.84	0.247	0.217425	0.0315409	0.804375	0.0976386	1.67431	0.167972	2.96365	0.242811	4.87462	0.322447	7.70691	0.407185	1.80721	0.176545	1.80721	0.176214					4.62731	0.284901	5.04251	0.315714	4.88747	0.306134	4.95281	0.312039	3.5061	0.222218	4.24603	0.271629	1.52574	0.101273	4.45028	0.283961	5.03139	0.318787	4.37553	0.279989	3.38625	0.219721	3.90042	0.250444	4.87186	0.309165
ConcSwap	FALSE	3.6	0.233	0.217376	0.0315346	0.804154	0.0976184	1.67376	0.167936	2.96252	0.242758	4.87246	0.322373	7.70299	0.407089	2.03919	0.191351	2.03919	0.190991					4.61036	0.2836	5.03313	0.315064	4.87166	0.304813	4.94547	0.311302	3.48122	0.220497	4.22118	0.269676	1.49861	0.0994179	4.43955	0.283136	5.02122	0.318129	4.34727	0.277944	3.36251	0.217983	3.89048	0.249698	4.8583	0.308235
1st Symbol-row	1	2.02	0.1432	0.217339	0.0315273	0.80399	0.0975952	1.67336	0.167895	2.96168	0.242697	4.87085	0.32229	7.70008	0.406981	2.29034	0.206344	2.29034	0.205953					4.59993	0.282695	5.02736	0.314578	4.86193	0.303867	4.94096	0.310745	3.46591	0.219371	4.20589	0.268236	1.4819	0.0981997	4.43295	0.28249	5.01496	0.317649	4.32989	0.276516	3.34791	0.216784	3.88436	0.24918	4.84995	0.307596
		5.223	0.3291	0.217316	0.0315195	0.803889	0.0975701	1.67311	0.16785	2.96116	0.24263	4.86987	0.322199	7.69829	0.406863	2.56225	0.221526	2.56225	0.221103					4.59642	0.282221	5.02542	0.314272	4.85866	0.303334	4.93945	0.310389	3.46075	0.218885	4.20075	0.267363	1.47627	0.0976656	4.43073	0.282048	5.01285	0.317368	4.32403	0.27576	3.34299	0.216169	3.8823	0.248909	4.84714	0.307272
		4.34	0.279	0.217308	0.0315113	0.803855	0.097544	1.67302	0.167804	2.96098	0.242562	4.86953	0.322105	7.69769	0.40674	2.85662	0.236899	2.85662	0.236444					4.59996	0.282195	5.02738	0.31416	4.86197	0.303234	4.94099	0.31025	3.46593	0.219056	4.20595	0.267091	1.48193	0.097836	4.43298	0.281828	5.01498	0.317295	4.32993	0.275705	3.34794	0.216163	3.88438	0.248894	4.84997	0.307276
		3.95	0.257	0.217316	0.0315031	0.803889	0.0975179	1.67311	0.167758	2.96116	0.242493	4.86987	0.32201	7.69829	0.406617	3.17532	0.252465	3.17532	0.251977					4.61042	0.28262	5.03317	0.314246	4.87174	0.303571	4.94554	0.310331	3.48126	0.219879	4.22131	0.26743	1.49865	0.0987045	4.43961	0.281836	5.02125	0.317434	4.34737	0.276353	3.36259	0.216766	3.89051	0.249138	4.85833	0.307608
		4.962	0.3153	0.217339	0.0314953	0.80399	0.0974929	1.67336	0.167713	2.96168	0.242426	4.87085	0.32192	7.70008	0.406499	3.52035	0.268227	3.52035	0.267706					4.6274	0.283477	5.04257	0.314525	4.88759	0.304331	4.9529	0.31063	3.50615	0.221321	4.24622	0.268367	1.52581	0.100238	4.45037	0.282074	5.03144	0.317779	4.37567	0.277679	3.38636	0.217953	3.90048	0.249629	4.87191	0.308254
		2.87	0.196	0.217376	0.031488	0.804154	0.0974697	1.67376	0.167672	2.96252	0.242365	4.87246	0.321836	7.70299	0.406391	3.8939	0.284187	3.8939	0.283632					4.65025	0.284736	5.05521	0.314988	4.90892	0.305487	4.96281	0.311136	3.53965	0.223327	4.27973	0.269867	1.56234	0.102376	4.46485	0.282533	5.04514	0.318317	4.41374	0.279632	3.41833	0.219681	3.91388	0.25035	4.89018	0.30919
		5.008	0.3181	0.217425	0.0314817	0.804375	0.0974495	1.67431	0.167636	2.96365	0.242312	4.87462	0.321763	7.70691	0.406295	4.29831	0.300349	4.29831	0.299758					4.67808	0.286346	5.07061	0.315617	4.9349	0.306992	4.97488	0.311829	3.58045	0.22582	4.32055	0.271872	1.60686	0.105039	4.48247	0.283193	5.06184	0.319028	4.46012	0.282138	3.45729	0.221882	3.9302	0.251273	4.91245	0.310381
		3.926	0.2569	0.217486	0.0314764	0.804644	0.0974328	1.67497	0.167607	2.96503	0.242268	4.87725	0.321703	7.71168	0.406217	4.73615	0.316713	4.73615	0.316087					4.70982	0.288247	5.08818	0.316388	4.96453	0.30879	4.98864	0.312681	3.62701	0.228704	4.36712	0.274304	1.65765	0.108123	4.50258	0.28403	5.08089	0.319883	4.51303	0.285099	3.50174	0.224472	3.94883	0.252362	4.93784	0.311779
		3.274	0.22	0.217555	0.0314726	0.804951	0.0974205	1.67573	0.167585	2.96661	0.242235	4.88026	0.321658	7.71712	0.406159	5.21016	0.333284	5.21016	0.33262					4.74427	0.290365	5.10723	0.31727	4.99668	0.310811	5.00357	0.313662	3.67752	0.231869	4.41764	0.277071	1.71275	0.111509	4.5244	0.285013	5.10155	0.32085	4.57043	0.288402	3.54996	0.227351	3.96903	0.253576	4.96539	0.313332
		1.35	0.1112	0.21763	0.0314702	0.805284	0.0974128	1.67655	0.167571	2.96832	0.242215	4.88351	0.321631	7.72303	0.406123	5.72335	0.350063	5.72335	0.349362					4.78008	0.292619	5.12705	0.31823	5.03011	0.312978	5.01909	0.314732	3.73005	0.235193	4.47017	0.280065	1.77006	0.115068	4.54708	0.286102	5.12304	0.321893	4.63012	0.291921	3.6001	0.230409	3.99005	0.254867	4.99405	0.31498
		1.309	0.109	0.217708	0.0314694	0.805631	0.0974103	1.67741	0.167567	2.97009	0.242208	4.8869	0.321621	7.72917	0.406111	6.27895	0.367054	6.27895	0.366314					4.81589	0.294922	5.14687	0.319232	5.06353	0.315207	5.03461	0.315851	3.78258	0.238547	4.5227	0.283172	1.82736	0.118663	4.56977	0.287257	5.14453	0.32297	4.68981	0.295519	3.65024	0.233528	4.01106	0.256187	5.0227	0.31666
		0.652	0.072	0.217785	0.0314702	0.805977	0.0974128	1.67827	0.167571	2.97187	0.242215	4.89029	0.321631	7.73531	0.406123	6.88046	0.384258	6.88046	0.383479					4.85033	0.297186	5.16592	0.320236	5.09567	0.317412	5.04953	0.316976	3.83309	0.241804	4.5732	0.286272	1.88246	0.122155	4.59157	0.288433	5.16519	0.324041	4.7472	0.299059	3.69845	0.236588	4.03126	0.257484	5.05025	0.318306
		0.586	0.06874	0.21786	0.0314726	0.80631	0.0974205	1.67909	0.167585	2.97358	0.242235	4.89355	0.321658	7.74121	0.406159	7.53167	0.401678	7.53167	0.400859					4.88206	0.299323	5.18348	0.321204	5.12528	0.31951	5.06327	0.318063	3.87963	0.244837	4.61973	0.289247	1.93324	0.125411	4.61166	0.289584	5.18423	0.325064	4.80009	0.302405	3.74287	0.239472	4.04987	0.258708	5.07563	0.319856
		4.04	0.264	0.217929	0.0314764	0.806617	0.0974328	1.67985	0.167607	2.97516	0.242268	4.89655	0.321703	7.74666	0.406217	8.2367	0.419318	8.2367	0.418458					4.90987	0.301253	5.19887	0.322099	5.15123	0.321419	5.07531	0.319071	3.92043	0.247531	4.66051	0.291982	1.97774	0.128305	4.62927	0.290667	5.20092	0.326	4.84644	0.305427	3.78181	0.242069	4.06619	0.259813	5.09788	0.32125
		0.723	0.0769	0.21799	0.0314817	0.806887	0.0974495	1.68051	0.167636	2.97654	0.242312	4.89919	0.321763	7.75143	0.406295	8.99999	0.43718	8.99999	0.436278					4.93269	0.302899	5.21149	0.322886	5.17253	0.323066	5.08519	0.319961	3.9539	0.249782	4.69397	0.294371	2.01426	0.130727	4.64372	0.291639	5.21461	0.326813	4.88447	0.308011	3.81375	0.244279	4.07958	0.260756	5.11614	0.322435
		1.114	0.0997	0.218039	0.031488	0.807107	0.0974697	1.68106	0.167672	2.97767	0.242365	4.90135	0.321836	7.75534	0.406391	9	0.43718	9	0.436278					4.94964	0.3042	5.22087	0.323536	5.18834	0.324387	5.09253	0.320698	3.97878	0.251503	4.71882	0.296324	2.04139	0.132582	4.65445	0.292464	5.22478	0.327471	4.91273	0.310056	3.83749	0.246017	4.08952	0.261502	5.1297	0.323365
		5.331	0.3333	0.218076	0.0314953	0.807272	0.0974929	1.68147	0.167713	2.97851	0.242426	4.90295	0.32192	7.75825	0.406499	IsoLine	IsoLine	9	0.438082					4.96007	0.305105	5.22664	0.324022	5.19807	0.325333	5.09704	0.321255	3.99409	0.252629	4.73411	0.297764	2.0581	0.1338	4.66105	0.29311	5.23104	0.327951	4.93011	0.311484	3.85209	0.247216	4.09564	0.26202	5.13805	0.324004
		4.73	0.303	0.218099	0.0315031	0.807373	0.0975179	1.68171	0.167758	2.97903	0.242493	4.90394	0.32201	7.76004	0.406617			8.99999	0.438082					4.96358	0.305579	5.22858	0.324328	5.20134	0.325866	5.09855	0.321611	3.99925	0.253115	4.73925	0.298637	2.06373	0.134334	4.66327	0.293552	5.23315	0.328232	4.93597	0.31224	3.85701	0.247831	4.0977	0.262291	5.14086	0.324328
		1.229	0.1064	0.218107	0.0315113	0.807407	0.097544	1.6818	0.167804	2.97921	0.242562	4.90427	0.322105	7.76065	0.40674			8.2367	0.420178					ErrEll	ErrEll	ErrEll	ErrEll	ErrEll	ErrEll	ErrEll	ErrEll	ErrEll	ErrEll	ErrEll	ErrEll	ErrEll	ErrEll	ErrEll	ErrEll	ErrEll	ErrEll	ErrEll	ErrEll	ErrEll	ErrEll	ErrEll	ErrEll	ErrEll	ErrEll
		0.992	0.0931	ConcTikEll	ConcTikEll	ConcTikEll	ConcTikEll	ConcTikEll	ConcTikEll	ConcTikEll	ConcTikEll	ConcTikEll	ConcTikEll	ConcTikEll	ConcTikEll			7.53167	0.402497
		1.142	0.1022															6.88046	0.385037
		1.18	0.1048															6.27895	0.367793
		2.224	0.1633															5.72335	0.350764
		3.37	0.228															5.21016	0.333948
		4.91	0.3135															4.73615	0.31734
		1.88	0.1463															4.29831	0.30094
		2.271	0.1691															3.8939	0.284743
		0.979	0.102															3.52035	0.268749
		4.952	0.3166															3.17532	0.252953
		2.13	0.166															2.85662	0.237354
		2.3	0.1759															2.56225	0.221949
		3.76	0.254															2.29034	0.206736
		4.88	0.3136															2.03919	0.191712
		2.41	0.186															1.80721	0.176876
		4.71	0.307															1.59294	0.162224
		4.67	0.3118															1.39503	0.147755
		5.08	0.3212															1.21222	0.133465
		5.02	0.3227															1.04336	0.119354
		5.205	0.3293															0.887391	0.105418
		5.191	0.3305															0.743328	0.0916558
		5.299	0.3344															0.610262	0.0780649
		5.279	0.3339															0.487352	0.0646432
		5.284	0.33431															0.373824	0.0513886
		5.346	0.3368															0.268961	0.0382991
		5.4	0.3384															0.172102	0.0253724
		5.325	0.3398															0.0826367	0.0126068
		5.423	0.34288															0	0
		5.478	0.3453															0	0
		5.522	0.34807															ConcBand	ConcBand
		6.213	0.3946
		6.829	0.4349
		IsoLine	IsoLine
[truncated: 108 more columns]

## Sheet: PlotDat4
Source sheet	all data	5.223	0.3291	200		600		1000		1400		1800		0	0	0	0	0.217708	0.0315113	0	0.0364045	5.35763	0.337201	4.4991	0.286541	4.25597	0.274076	5.14558	0.324522	3.18821	0.215569	5.27725	0.325343	4.04104	0.263044	3.37681	0.225841	1.52134	0.120978	1.42527	0.113557	0.691164	0.0742645	0.60803	0.0701386	4.39492	0.283573	0.754821	0.0786979
Plot name	Concordia3	4.34	0.279	0.218107	0.0315113	0.807407	0.097544	1.6818	0.167804	2.97921	0.242562	4.90427	0.322105	0.0743382	0.0113583	0.0743382	0.0113386	0.805631	0.097544	7	0.430619	5.35502	0.337293	4.49604	0.28656	4.25007	0.274024	5.14203	0.324723	3.18208	0.215333	5.27205	0.326265	4.03882	0.263141	3.37482	0.225851	1.51804	0.120889	1.42303	0.113651	0.690405	0.0743241	0.607597	0.0702597	4.3881	0.28331	0.754205	0.0787358
Plot Type	1	3.95	0.257	0.218099	0.0315195	0.807373	0.0975701	1.68171	0.16785	2.97903	0.24263	4.90394	0.322199	0.154203	0.0228457	0.154203	0.0228057	1.67741	0.167804			5.34735	0.33707	4.48698	0.286289	4.23265	0.273318	5.13157	0.324563	3.16397	0.214354	5.2567	0.326872	4.03226	0.262997	3.36897	0.225636	1.50829	0.120428	1.4164	0.113565	0.688171	0.0742944	0.606334	0.0703224	4.36789	0.282305	0.75239	0.0787031
1st free col	223	4.962	0.3153	0.218076	0.0315273	0.807272	0.0975952	1.68147	0.167895	2.97851	0.242697	4.90295	0.32229	0.240004	0.0344635	0.240004	0.0344029	2.97009	0.242562			5.3349	0.33654	4.47227	0.285737	4.20436	0.271984	5.11459	0.324046	3.13455	0.21267	5.23179	0.327143	4.02162	0.26262	3.35946	0.225204	1.49245	0.119612	1.40565	0.113305	0.684547	0.0741765	0.60429	0.0703243	4.33509	0.280596	0.749446	0.0786011
Sigma Level	2	2.87	0.196	0.218039	0.0315346	0.807107	0.0976184	1.68106	0.167936	2.97767	0.242758	4.90135	0.322373	0.332184	0.0462133	0.332184	0.0461315	4.8869	0.322105			5.31814	0.335725	4.45248	0.284926	4.1663	0.270075	5.09174	0.323194	3.09498	0.210346	5.19829	0.327066	4.00731	0.262023	3.34667	0.224572	1.47114	0.118472	1.39119	0.112878	0.679671	0.073975	0.601543	0.0702653	4.29095	0.27825	0.745486	0.0784337
Absolute Errs	TRUE	5.008	0.3181	0.21799	0.0315409	0.806887	0.0976386	1.68051	0.167972	2.97654	0.242811	4.89919	0.322447	0.431216	0.0580966	0.431216	0.0579932	IsoLine	IsoLine			5.29773	0.334655	4.42836	0.283887	4.11992	0.267664	5.06391	0.322038	3.04675	0.20747	5.15747	0.326645	3.98987	0.261229	3.33109	0.223764	1.44517	0.117054	1.37356	0.112303	0.673733	0.0736976	0.598199	0.0701477	4.23716	0.275356	0.740661	0.0782074
Symbol Type	1	3.926	0.2569	0.217929	0.0315461	0.806617	0.0976553	1.67985	0.168001	2.97516	0.242855	4.89655	0.322507	0.53761	0.0701148	0.53761	0.0699893					5.27445	0.333371	4.40085	0.282661	4.06702	0.264842	5.03216	0.320623	2.99173	0.204153	5.1109	0.325895	3.96997	0.260268	3.31331	0.222812	1.41554	0.11541	1.35346	0.111601	0.666959	0.073355	0.594386	0.0699759	4.17579	0.272025	0.735158	0.0779308
Inverse Plot	FALSE	3.274	0.22	0.21786	0.03155	0.80631	0.0976676	1.67909	0.168023	2.97358	0.242888	4.89355	0.322551	0.651913	0.0822695	0.651913	0.0821215					5.24919	0.331924	4.371	0.281294	4.00961	0.26172	4.99772	0.319004	2.93204	0.200523	5.06039	0.324846	3.94839	0.259178	3.29402	0.221752	1.3834	0.113605	1.33165	0.110799	0.659611	0.0729602	0.590251	0.0697567	4.10921	0.268387	0.729187	0.0776147
Color Plot	TRUE	1.35	0.1112	0.217785	0.0315524	0.805977	0.0976753	1.67827	0.168037	2.97187	0.242908	4.89029	0.322579	0.774713	0.0945623	0.774713	0.0943912					5.22292	0.330368	4.33996	0.279839	3.94992	0.258416	4.9619	0.317242	2.86996	0.196719	5.00785	0.323537	3.92594	0.258001	3.27396	0.220624	1.34997	0.111707	1.30896	0.109927	0.651969	0.0725286	0.585952	0.0694985	4.03997	0.264579	0.722979	0.077271
3D plot	FALSE	1.309	0.109	0.217708	0.0315532	0.805631	0.0976778	1.67741	0.168041	2.97009	0.242915	4.8869	0.322588	0.906642	0.106995	0.906642	0.1068					5.19666	0.328763	4.30892	0.278352	3.89023	0.255057	4.92609	0.315406	2.80788	0.192888	4.95533	0.32202	3.9035	0.256781	3.25391	0.219473	1.31654	0.10979	1.28628	0.109021	0.64433	0.0720767	0.581655	0.069211	3.97073	0.260749	0.716772	0.0769131
Linear	FALSE	0.652	0.072	0.21763	0.0315524	0.805284	0.0976753	1.67655	0.168037	2.96832	0.242908	4.88351	0.322579	1.04838	0.119568	1.04838	0.11935					5.17141	0.327171	4.27908	0.276889	3.83284	0.251773	4.89166	0.313565	2.74819	0.189176	4.90483	0.320352	3.88192	0.255566	3.23463	0.218341	1.2844	0.107927	1.26447	0.108113	0.636984	0.0716218	0.577525	0.0689055	3.90415	0.257045	0.710803	0.0765548
Data Range	D42:H79	0.586	0.06874	0.217555	0.03155	0.804951	0.0976676	1.67573	0.168023	2.96661	0.242888	4.88026	0.322551	1.20065	0.132285	1.20065	0.132041					5.14814	0.325653	4.25157	0.275508	3.77995	0.24869	4.85993	0.311791	2.69318	0.185726	4.85829	0.318597	3.86204	0.254402	3.21685	0.217274	1.25478	0.106189	1.24437	0.107239	0.630216	0.0711815	0.573721	0.0685936	3.84279	0.253607	0.705304	0.0762096
Filled Symbols	TRUE	4.04	0.264	0.217486	0.0315461	0.804644	0.0976553	1.67497	0.168001	2.96503	0.242855	4.87725	0.322507	1.36424	0.145146	1.36424	0.144877					5.12775	0.324268	4.22747	0.274261	3.73359	0.245927	4.83212	0.310152	2.64496	0.182671	4.81751	0.316823	3.84461	0.253334	3.20128	0.216311	1.22882	0.104644	1.22676	0.106433	0.624285	0.0707726	0.570389	0.0682873	3.78901	0.250569	0.700485	0.075891
ConcAge	FALSE	0.723	0.0769	0.217425	0.0315409	0.804375	0.0976386	1.67431	0.167972	2.96365	0.242811	4.87462	0.322447	1.54	0.158153	1.54	0.157858					5.11102	0.323068	4.20769	0.273196	3.69555	0.243589	4.8093	0.308711	2.6054	0.180129	4.78404	0.315098	3.83031	0.252403	3.1885	0.21549	1.20752	0.103352	1.21231	0.105726	0.619419	0.0704108	0.567656	0.0679985	3.74487	0.248047	0.69653	0.0756112
ConcSwap	FALSE	1.114	0.0997	0.217376	0.0315346	0.804154	0.0976184	1.67376	0.167936	2.96252	0.242758	4.87246	0.322373	1.72882	0.171307	1.72882	0.170987					5.09859	0.3221	4.19299	0.272354	3.66729	0.241766	4.79236	0.307523	2.576	0.178196	4.75919	0.313489	3.81969	0.251645	3.17901	0.214842	1.19169	0.10236	1.20157	0.105145	0.615806	0.0701102	0.565629	0.0677381	3.71208	0.246138	0.693593	0.0753809
1st Symbol-row	1	5.331	0.3333	0.217339	0.0315273	0.80399	0.0975952	1.67336	0.167895	2.96168	0.242697	4.87085	0.32229	1.93167	0.184611	1.93167	0.184264					5.09095	0.321402	4.18395	0.271767	3.6499	0.240529	4.78193	0.306634	2.5579	0.176948	4.74389	0.312057	3.81315	0.251089	3.17316	0.214393	1.18194	0.101709	1.19496	0.104711	0.613583	0.0698822	0.564384	0.0675162	3.69189	0.244916	0.691787	0.075209
		4.73	0.303	0.217316	0.0315195	0.803889	0.0975701	1.67311	0.16785	2.96116	0.24263	4.86987	0.322199	2.14961	0.198067	2.14961	0.197692					5.08837	0.320999	4.1809	0.271459	3.64403	0.239924	4.77842	0.306078	2.55179	0.176431	4.73875	0.310857	3.81096	0.250756	3.17119	0.214159	1.17866	0.101422	1.19273	0.104443	0.612836	0.0697355	0.56397	0.0673414	3.68508	0.244427	0.691179	0.0751021
		1.229	0.1064	0.217308	0.0315113	0.803855	0.097544	1.67302	0.167804	2.96098	0.242562	4.86953	0.322105	2.38374	0.211675	2.38374	0.211272					5.09098	0.320907	4.18396	0.27144	3.64993	0.239976	4.78197	0.305877	2.55792	0.176667	4.74395	0.309935	3.81318	0.250659	3.17318	0.214149	1.18196	0.101511	1.19497	0.104349	0.613595	0.0696759	0.564403	0.0672203	3.6919	0.24469	0.691795	0.0750642
		0.992	0.0931	0.217316	0.0315031	0.803889	0.0975179	1.67311	0.167758	2.96116	0.242493	4.86987	0.32201	2.63528	0.225437	2.63528	0.225006					5.09865	0.32113	4.19302	0.271711	3.66735	0.240682	4.79243	0.306037	2.57603	0.177646	4.7593	0.309328	3.81974	0.250803	3.17903	0.214364	1.19171	0.101972	1.2016	0.104435	0.615829	0.0697056	0.565666	0.0671576	3.71211	0.245695	0.69361	0.0750969
		1.142	0.1022	0.217339	0.0314953	0.80399	0.0974929	1.67336	0.167713	2.96168	0.242426	4.87085	0.32192	2.90552	0.239356	2.90552	0.238896					5.1111	0.32166	4.20773	0.272263	3.69564	0.242016	4.80941	0.306554	2.60545	0.17933	4.78421	0.309057	3.83038	0.25118	3.18854	0.214796	1.20755	0.102788	1.21235	0.104695	0.619453	0.0698235	0.56771	0.0671557	3.74491	0.247404	0.696554	0.0751989
		1.18	0.1048	0.217376	0.031488	0.804154	0.0974697	1.67376	0.167672	2.96252	0.242365	4.87246	0.321836	3.19585	0.253433	3.19585	0.252943					5.12786	0.322475	4.22752	0.273074	3.7337	0.243925	4.83226	0.307406	2.64502	0.181654	4.81771	0.309134	3.84469	0.251777	3.20133	0.215428	1.22886	0.103928	1.22681	0.105122	0.624329	0.070025	0.570457	0.0672147	3.78905	0.24975	0.700514	0.0753663
		2.224	0.1633	0.217425	0.0314817	0.804375	0.0974495	1.67431	0.167636	2.96365	0.242312	4.87462	0.321763	3.50777	0.26767	3.50777	0.26715					5.14827	0.323545	4.25164	0.274113	3.78008	0.246336	4.86009	0.308562	2.69325	0.18453	4.85853	0.309555	3.86213	0.252571	3.21691	0.216236	1.25483	0.105346	1.24444	0.105697	0.630267	0.0703024	0.573801	0.0673323	3.84284	0.252644	0.705339	0.0755926
		4.91	0.3135	0.217486	0.0314764	0.804644	0.0974328	1.67497	0.167607	2.96503	0.242268	4.87725	0.321703	3.84287	0.282069	3.84287	0.281518					5.17155	0.324829	4.27915	0.275339	3.83298	0.249158	4.89184	0.309977	2.74827	0.187847	4.9051	0.310305	3.88203	0.253532	3.23469	0.217188	1.28446	0.10699	1.26454	0.106399	0.637041	0.070645	0.577614	0.0675041	3.90421	0.255975	0.710842	0.0758692
		4.952	0.3166	0.217555	0.0314726	0.804951	0.0974205	1.67573	0.167585	2.96661	0.242235	4.88026	0.321658	4.20288	0.296631	4.20288	0.296048					5.19681	0.326276	4.309	0.276706	3.89039	0.25228	4.92628	0.311596	2.80796	0.191477	4.95561	0.311354	3.90361	0.254622	3.25398	0.218248	1.3166	0.108795	1.28635	0.107201	0.644389	0.0710398	0.581749	0.0677233	3.97079	0.259613	0.716813	0.0761853
		4.88	0.3136	0.21763	0.0314702	0.805284	0.0974128	1.67655	0.167571	2.96832	0.242215	4.88351	0.321631	4.58965	0.311359	4.58965	0.310744					5.22308	0.327832	4.34004	0.278161	3.95008	0.255584	4.9621	0.313358	2.87004	0.195281	5.00815	0.312663	3.92606	0.255799	3.27404	0.219376	1.35003	0.110693	1.30904	0.108073	0.652031	0.0714714	0.586048	0.0679815	4.04003	0.263421	0.723021	0.076529
		5.08	0.3212	0.217708	0.0314694	0.805631	0.0974103	1.67741	0.167567	2.97009	0.242208	4.8869	0.321621	5.00517	0.326254	5.00517	0.325606					5.24934	0.329437	4.37108	0.279648	4.00977	0.258943	4.99791	0.315194	2.93212	0.199112	5.06067	0.31418	3.9485	0.257019	3.29409	0.220527	1.38346	0.11261	1.33172	0.108979	0.65967	0.0719233	0.590345	0.068269	4.10927	0.267251	0.729228	0.0768869
		5.02	0.3227	0.217785	0.0314702	0.805977	0.0974128	1.67827	0.167571	2.97187	0.242215	4.89029	0.321631	5.45159	0.341318	5.45159	0.340636					5.27459	0.331029	4.40092	0.281111	4.06716	0.262227	5.03234	0.317035	2.99181	0.202824	5.11117	0.315848	3.97008	0.258234	3.31337	0.221659	1.4156	0.114473	1.35353	0.109887	0.667016	0.0723782	0.594475	0.0685745	4.17585	0.270955	0.735197	0.0772452
		5.205	0.3293	0.21786	0.0314726	0.80631	0.0974205	1.67909	0.167585	2.97358	0.242235	4.89355	0.321658	5.93119	0.356553	5.93119	0.355837					5.29786	0.332547	4.42843	0.282492	4.12005	0.26531	5.06407	0.318809	3.04682	0.206274	5.15771	0.317603	3.98996	0.259398	3.33115	0.222726	1.44522	0.116211	1.37363	0.110761	0.673784	0.0728185	0.598279	0.0688864	4.23721	0.274393	0.740696	0.0775904
		5.191	0.3305	0.217929	0.0314764	0.806617	0.0974328	1.67985	0.167607	2.97516	0.242268	4.89655	0.321703	6.44644	0.371961	6.44644	0.37121					5.31825	0.333932	4.45253	0.283739	4.16641	0.268073	5.09188	0.320448	3.09504	0.209329	5.19849	0.319377	4.00739	0.260466	3.34672	0.223689	1.47118	0.117756	1.39124	0.111567	0.679715	0.0732274	0.601611	0.0691927	4.29099	0.277431	0.745515	0.077909
		5.299	0.3344	0.21799	0.0314817	0.806887	0.0974495	1.68051	0.167636	2.97654	0.242312	4.89919	0.321763	6.99999	0.387544	6.99999	0.386758					5.33498	0.335132	4.47231	0.284804	4.20445	0.270411	5.1147	0.321889	3.1346	0.211871	5.23196	0.321102	4.02169	0.261397	3.3595	0.22451	1.49248	0.119048	1.40569	0.112274	0.684581	0.0735892	0.604344	0.0694815	4.33513	0.279953	0.74947	0.0781888
		5.279	0.3339	0.218039	0.031488	0.807107	0.0974697	1.68106	0.167672	2.97767	0.242365	4.90135	0.321836	7	0.387544	7	0.386758					5.34741	0.3361	4.48701	0.285646	4.23271	0.272234	5.13164	0.323077	3.164	0.213804	5.25681	0.322711	4.03231	0.262155	3.36899	0.225158	1.50831	0.12004	1.41643	0.112855	0.688194	0.0738898	0.606371	0.0697419	4.36792	0.281862	0.752407	0.0784191
		5.284	0.33431	0.218076	0.0314953	0.807272	0.0974929	1.68147	0.167713	2.97851	0.242426	4.90295	0.32192	IsoLine	IsoLine	7	0.388331					5.35505	0.336798	4.49605	0.286233	4.2501	0.273471	5.14207	0.323966	3.1821	0.215052	5.27211	0.324143	4.03885	0.262711	3.37484	0.225607	1.51806	0.120691	1.42304	0.113289	0.690417	0.0741178	0.607616	0.0699638	4.38811	0.283084	0.754213	0.078591
		5.346	0.3368	0.218099	0.0315031	0.807373	0.0975179	1.68171	0.167758	2.97903	0.242493	4.90394	0.32201			6.99999	0.388331					5.35763	0.337201	4.4991	0.286541	4.25597	0.274076	5.14558	0.324522	3.18821	0.215569	5.27725	0.325343	4.04104	0.263044	3.37681	0.225841	1.52134	0.120978	1.42527	0.113557	0.691164	0.0742645	0.60803	0.0701386	4.39492	0.283573	0.754821	0.0786979
		5.4	0.3384	0.218107	0.0315113	0.807407	0.097544	1.6818	0.167804	2.97921	0.242562	4.90427	0.322105			6.44644	0.372712					ErrEll	ErrEll	ErrEll	ErrEll	ErrEll	ErrEll	ErrEll	ErrEll	ErrEll	ErrEll	ErrEll	ErrEll	ErrEll	ErrEll	ErrEll	ErrEll	ErrEll	ErrEll	ErrEll	ErrEll	ErrEll	ErrEll	ErrEll	ErrEll	ErrEll	ErrEll	ErrEll	ErrEll
		5.325	0.3398	ConcTikEll	ConcTikEll	ConcTikEll	ConcTikEll	ConcTikEll	ConcTikEll	ConcTikEll	ConcTikEll	ConcTikEll	ConcTikEll			5.93119	0.357269
		5.423	0.34288													5.45159	0.341999
		5.478	0.3453													5.00517	0.326902
		5.522	0.34807													4.58965	0.311974
		IsoLine	IsoLine													4.20288	0.297214
																3.84287	0.28262
																3.50777	0.268191
																3.19585	0.253923
																2.90552	0.239817
																2.63528	0.225868
																2.38374	0.212077
																2.14961	0.198441
																1.93167	0.184959
																1.72882	0.171628
																1.54	0.158447
																1.36424	0.145414
																1.20065	0.132528
																1.04838	0.119787
																0.906642	0.107189
																0.774713	0.0947335
																0.651913	0.0824176
																0.53761	0.0702403
																0.431216	0.0582
																0.332184	0.0462951
																0.240004	0.0345242
																0.154203	0.0228857
																0.0743382	0.0113781
																0	0
																0	0
																ConcBand	ConcBand
[truncated: 172 more columns]

## Sheet: PlotDat5
Source sheet	all data NEW	1.087	0.0979	200		600		1000		1400		1800		2200		0	0	0	0	0.217708	0.0315113	0	0.0359371	1.13106	0.100877	0.943268	0.0909051	1.93686	0.143774	2.11686	0.151453	0.669492	0.0716428	2.62268	0.179635	2.37554	0.170817	3.0937	0.198911	2.09385	0.160618	3.08463	0.212775	3.26676	0.218648	3.50513	0.228011	4.2391	0.264129
Plot name	Concordia1	0.909	0.0887	0.218107	0.0315113	0.807407	0.097544	1.6818	0.167804	2.97921	0.242562	4.90427	0.322105	7.76065	0.40674	0.0826367	0.0125848	0.0826367	0.0125629	0.805631	0.097544	9	0.54435	1.13019	0.1011	0.942597	0.09107	1.93401	0.144319	2.11401	0.151982	0.668804	0.0717585	2.61601	0.180957	2.3742	0.171073	3.0916	0.199324	2.0928	0.160873	3.082	0.21332	3.2654	0.218928	3.5032	0.228424	4.236	0.264797
Plot Type	1	1.79	0.1365	0.218099	0.0315195	0.807373	0.0975701	1.68171	0.16785	2.97903	0.24263	4.90394	0.322199	7.76004	0.406863	0.172102	0.0253281	0.172102	0.0252837	1.67741	0.167804			1.12767	0.101199	0.940634	0.0911439	1.92562	0.144564	2.10562	0.15222	0.666778	0.0718106	2.59643	0.18155	2.37029	0.171188	3.08545	0.199509	2.08971	0.160988	3.07431	0.213564	3.26141	0.219054	3.49753	0.228609	4.2269	0.265097
1st free col	161	1.97	0.1444	0.218076	0.0315273	0.807272	0.0975952	1.68147	0.167895	2.97851	0.242697	4.90295	0.32229	7.75825	0.406981	0.268961	0.0382317	0.268961	0.0381642	2.97009	0.242562			1.12358	0.101172	0.937455	0.0911238	1.91202	0.144499	2.09202	0.152157	0.663493	0.0717969	2.56469	0.181392	2.36394	0.171157	3.07547	0.19946	2.08472	0.160957	3.06183	0.213499	3.25495	0.219021	3.48834	0.22856	4.21216	0.265017
Sigma Level	2	0.634	0.0701	0.218039	0.0315346	0.807107	0.0976184	1.68106	0.167936	2.97767	0.242758	4.90135	0.322373	7.75534	0.407089	0.373824	0.0512976	0.373824	0.0512066	4.8869	0.322105			1.11809	0.101019	0.933183	0.0910106	1.89373	0.144127	2.07373	0.151796	0.659074	0.071718	2.522	0.180489	2.3554	0.170982	3.06206	0.199178	2.078	0.160781	3.04506	0.213126	3.24626	0.218829	3.47599	0.228277	4.19233	0.264559
Absolute Errs	TRUE	2.28	0.162	0.21799	0.0315409	0.806887	0.0976386	1.68051	0.167972	2.97654	0.242811	4.89919	0.322447	7.75143	0.407185	0.487352	0.064528	0.487352	0.0644129	7.72917	0.40674			1.1114	0.100746	0.927982	0.0908086	1.87145	0.143462	2.05146	0.151151	0.653692	0.0715769	2.47002	0.178876	2.34501	0.17067	3.04572	0.198674	2.06983	0.160468	3.02464	0.212461	3.23568	0.218486	3.46095	0.227773	4.16819	0.263742
Symbol Type	1	2.307	0.1674	0.217929	0.0315461	0.806617	0.0976553	1.67985	0.168001	2.97516	0.242855	4.89655	0.322507	7.74666	0.407263	0.610262	0.077925	0.610262	0.077785	IsoLine	IsoLine			1.10377	0.100364	0.922051	0.0905255	1.84604	0.142529	2.02605	0.150246	0.647552	0.0713791	2.41073	0.176614	2.33315	0.170232	3.02709	0.197967	2.06051	0.16003	3.00134	0.211527	3.22361	0.218005	3.4438	0.227066	4.14066	0.262597
Inverse Plot	FALSE	2.986	0.1934	0.21786	0.03155	0.80631	0.0976676	1.67909	0.168023	2.97358	0.242888	4.89355	0.322551	7.74121	0.407321	0.743328	0.0914905	0.743328	0.0913251					1.0955	0.0998871	0.915618	0.0901723	1.81848	0.141364	1.99849	0.149117	0.640892	0.0711321	2.34642	0.17379	2.32029	0.169685	3.00688	0.197084	2.0504	0.159482	2.97608	0.210362	3.21051	0.217405	3.4252	0.226183	4.1108	0.261167
Color Plot	TRUE	2.04	0.1572	0.217785	0.0315524	0.805977	0.0976753	1.67827	0.168037	2.97187	0.242908	4.89029	0.322579	7.73531	0.407357	0.887391	0.105227	0.887391	0.105035					1.0869	0.0993338	0.908932	0.0897626	1.78983	0.140012	1.96984	0.147806	0.633968	0.0708455	2.27956	0.170513	2.30692	0.16905	2.98586	0.19606	2.0399	0.158847	2.94981	0.209011	3.1969	0.216709	3.40585	0.225159	4.07976	0.259508
3D plot	FALSE	2.95	0.2055	0.217708	0.0315532	0.805631	0.0976778	1.67741	0.168041	2.97009	0.242915	4.8869	0.322588	7.72917	0.407369	1.04336	0.119136	1.04336	0.118918					1.07831	0.0987255	0.902248	0.0893119	1.76118	0.138526	1.94119	0.146365	0.627044	0.0705302	2.21272	0.166909	2.29355	0.168351	2.96486	0.194934	2.02939	0.158149	2.92355	0.207524	3.1833	0.215943	3.38651	0.224033	4.04872	0.257683
Linear	FALSE	3.197	0.2149	0.21763	0.0315524	0.805284	0.0976753	1.67655	0.168037	2.96832	0.242908	4.88351	0.322579	7.72303	0.407357	1.21222	0.13322	1.21222	0.132975					1.07005	0.0980854	0.895823	0.0888378	1.73364	0.136961	1.91365	0.144848	0.620388	0.0701983	2.14846	0.163117	2.2807	0.167617	2.94466	0.193749	2.0193	0.157414	2.89831	0.20596	3.17021	0.215137	3.36793	0.222848	4.01889	0.255763
Data Range	D3:G70	3.406	0.2225	0.217555	0.03155	0.804951	0.0976676	1.67573	0.168023	2.96661	0.242888	4.88026	0.322551	7.71712	0.407321	1.39503	0.147481	1.39503	0.147208					1.06244	0.0974382	0.889905	0.0883584	1.70826	0.135379	1.88827	0.143314	0.614255	0.0698627	2.08925	0.159281	2.26885	0.166873	2.92605	0.19255	2.01	0.156671	2.87505	0.204377	3.15816	0.214322	3.3508	0.221649	3.99141	0.253821
Filled Symbols	TRUE	4.08	0.2552	0.217486	0.0315461	0.804644	0.0976553	1.67497	0.168001	2.96503	0.242855	4.87725	0.322507	7.71168	0.407263	1.59294	0.161922	1.59294	0.16162					1.05578	0.0968087	0.88472	0.0878921	1.68603	0.13384	1.86604	0.141821	0.60888	0.0695362	2.03738	0.15555	2.25848	0.166151	2.90975	0.191384	2.00185	0.155948	2.85467	0.202838	3.1476	0.213529	3.3358	0.220483	3.96733	0.251932
ConcAge	FALSE	3.85	0.2478	0.217425	0.0315409	0.804375	0.0976386	1.67431	0.167972	2.96365	0.242811	4.87462	0.322447	7.70691	0.407185	1.80721	0.176545	1.80721	0.176214					1.05031	0.0962212	0.880469	0.0874569	1.66779	0.132403	1.8478	0.140428	0.604471	0.0692314	1.99483	0.152067	2.24997	0.165476	2.89637	0.190296	1.99517	0.155273	2.83796	0.201402	3.13894	0.212789	3.32349	0.219395	3.94758	0.250169
ConcSwap	FALSE	0.544	0.0675	0.217376	0.0315346	0.804154	0.0976184	1.67376	0.167936	2.96252	0.242758	4.87246	0.322373	7.70299	0.407089	2.03919	0.191351	2.03919	0.190991					1.04626	0.0956982	0.877314	0.0870694	1.65425	0.131124	1.83425	0.139187	0.601197	0.0689599	1.96323	0.148965	2.24365	0.164875	2.88645	0.189327	1.99021	0.154673	2.82555	0.200122	3.13251	0.21213	3.31436	0.218426	3.93292	0.248599
1st Symbol-row	1	4.357	0.2765	0.217339	0.0315273	0.80399	0.0975952	1.67336	0.167895	2.96168	0.242697	4.87085	0.32229	7.70008	0.406981	2.29034	0.206344	2.29034	0.205953					1.04377	0.0952598	0.875377	0.0867446	1.64592	0.130051	1.82593	0.138147	0.599183	0.0687323	1.94381	0.146365	2.23976	0.164371	2.88034	0.188514	1.98716	0.154169	2.81792	0.19905	3.12856	0.211577	3.30874	0.217613	3.92391	0.247283
		4.215	0.2737	0.217316	0.0315195	0.803889	0.0975701	1.67311	0.16785	2.96116	0.24263	4.86987	0.322199	7.69829	0.406863	2.56225	0.221526	2.56225	0.221103					1.04294	0.0949228	0.874732	0.0864949	1.64314	0.129226	1.82314	0.137347	0.598508	0.0685572	1.93732	0.144365	2.23846	0.163983	2.8783	0.187889	1.98615	0.153782	2.81537	0.198225	3.12724	0.211152	3.30687	0.216989	3.9209	0.246271
		4.421	0.2852	0.217308	0.0315113	0.803855	0.097544	1.67302	0.167804	2.96098	0.242562	4.86953	0.322105	7.69769	0.40674	2.85662	0.236899	2.85662	0.236444					1.04381	0.0947003	0.875403	0.08633	1.64599	0.128681	1.82599	0.136818	0.599196	0.0684415	1.94399	0.143043	2.2398	0.163727	2.8804	0.187476	1.9872	0.153527	2.818	0.19768	3.1286	0.210872	3.3088	0.216576	3.924	0.245603
		4.43	0.2916	0.217316	0.0315031	0.803889	0.0975179	1.67311	0.167758	2.96116	0.242493	4.86987	0.32201	7.69829	0.406617	3.17532	0.252465	3.17532	0.251977					1.04633	0.0946007	0.877366	0.0862561	1.65438	0.128436	1.83438	0.13658	0.601222	0.0683894	1.96357	0.14245	2.24371	0.163612	2.88655	0.187291	1.99029	0.153412	2.82569	0.197436	3.13259	0.210746	3.31447	0.216391	3.9331	0.245303
		5.083	0.3233	0.217339	0.0314953	0.80399	0.0974929	1.67336	0.167713	2.96168	0.242426	4.87085	0.32192	7.70008	0.406499	3.52035	0.268227	3.52035	0.267706					1.05042	0.094628	0.880545	0.0862762	1.66798	0.128501	1.84798	0.136643	0.604507	0.0684031	1.99531	0.142608	2.25006	0.163643	2.89653	0.18734	1.99528	0.153443	2.83817	0.197501	3.13905	0.210779	3.32366	0.21644	3.94784	0.245383
		5.106	0.3236	0.217376	0.031488	0.804154	0.0974697	1.67376	0.167672	2.96252	0.242365	4.87246	0.321836	7.70299	0.406391	3.8939	0.284187	3.8939	0.283632					1.05591	0.0947809	0.884817	0.0863894	1.68627	0.128873	1.86627	0.137004	0.608926	0.068482	2.038	0.143511	2.2586	0.163818	2.90994	0.187622	2.002	0.153619	2.85494	0.197874	3.14774	0.210971	3.33601	0.216723	3.96767	0.245841
		5.245	0.3294	0.217425	0.0314817	0.804375	0.0974495	1.67431	0.167636	2.96365	0.242312	4.87462	0.321763	7.70691	0.406295	4.29831	0.300349	4.29831	0.299758					1.0626	0.0950538	0.890018	0.0865914	1.70855	0.129538	1.88854	0.137649	0.614308	0.0686231	2.08998	0.145124	2.26899	0.16413	2.92628	0.188126	2.01017	0.153932	2.87536	0.198539	3.15832	0.211314	3.35105	0.217227	3.99181	0.246658
		5.149	0.3275	0.217486	0.0314764	0.804644	0.0974328	1.67497	0.167607	2.96503	0.242268	4.87725	0.321703	7.71168	0.406217	4.73615	0.316713	4.73615	0.316087					1.07023	0.095436	0.895949	0.0868745	1.73396	0.130471	1.91395	0.138554	0.620448	0.0688209	2.14927	0.147386	2.28085	0.164568	2.94491	0.188833	2.01949	0.15437	2.89866	0.199473	3.17039	0.211795	3.3682	0.217934	4.01934	0.247803
		5.18	0.3273	0.217555	0.0314726	0.804951	0.0974205	1.67573	0.167585	2.96661	0.242235	4.88026	0.321658	7.71712	0.406159	5.21016	0.333284	5.21016	0.33262					1.0785	0.0959129	0.902382	0.0872277	1.76152	0.131636	1.94151	0.139683	0.627108	0.0690679	2.21358	0.15021	2.29371	0.165115	2.96512	0.189716	2.0296	0.154918	2.92392	0.200638	3.18349	0.212395	3.3868	0.218817	4.0492	0.249233
		5.246	0.3296	0.21763	0.0314702	0.805284	0.0974128	1.67655	0.167571	2.96832	0.242215	4.88351	0.321631	7.72303	0.406123	5.72335	0.350063	5.72335	0.349362					1.0871	0.0964662	0.909068	0.0876374	1.79017	0.132988	1.97016	0.140994	0.634032	0.0693545	2.28044	0.153487	2.30708	0.16575	2.98614	0.19074	2.0401	0.155553	2.95019	0.201989	3.1971	0.213091	3.40615	0.219841	4.08024	0.250892
		5.252	0.331	0.217708	0.0314694	0.805631	0.0974103	1.67741	0.167567	2.97009	0.242208	4.8869	0.321621	7.72917	0.406111	6.27895	0.367054	6.27895	0.366314					1.09569	0.0970745	0.915752	0.0880881	1.81882	0.134474	1.99881	0.142435	0.640956	0.0696698	2.34728	0.157091	2.32045	0.166449	3.00714	0.191866	2.05061	0.156251	2.97645	0.203476	3.2107	0.213857	3.42549	0.220967	4.11128	0.252717
		5.186	0.3281	0.217785	0.0314702	0.805977	0.0974128	1.67827	0.167571	2.97187	0.242215	4.89029	0.321631	7.73531	0.406123	6.88046	0.384258	6.88046	0.383479					1.10395	0.0977146	0.922177	0.0885622	1.84636	0.136039	2.02635	0.143952	0.647612	0.0700017	2.41154	0.160883	2.3333	0.167183	3.02734	0.193051	2.0607	0.156986	3.00169	0.20504	3.22379	0.214663	3.44407	0.222152	4.14111	0.254637
		5.308	0.3329	0.21786	0.0314726	0.80631	0.0974205	1.67909	0.167585	2.97358	0.242235	4.89355	0.321658	7.74121	0.406159	7.53167	0.401678	7.53167	0.400859					1.11156	0.0983618	0.928095	0.0890416	1.87174	0.137621	2.05173	0.145486	0.653745	0.0703373	2.47075	0.164719	2.34515	0.167927	3.04595	0.19425	2.07	0.157729	3.02495	0.206623	3.23584	0.215478	3.4612	0.223351	4.16859	0.256579
		5.312	0.3344	0.217929	0.0314764	0.806617	0.0974328	1.67985	0.167607	2.97516	0.242268	4.89655	0.321703	7.74666	0.406217	8.2367	0.419318	8.2367	0.418458					1.11822	0.0989913	0.93328	0.0895079	1.89397	0.13916	2.07396	0.146979	0.65912	0.0706638	2.52262	0.16845	2.35552	0.168649	3.06225	0.195416	2.07815	0.158452	3.04533	0.208162	3.2464	0.216271	3.4762	0.224517	4.19267	0.258468
		5.192	0.3305	0.21799	0.0314817	0.806887	0.0974495	1.68051	0.167636	2.97654	0.242312	4.89919	0.321763	7.75143	0.406295	8.99999	0.43718	8.99999	0.436278					1.12369	0.0995788	0.937531	0.0899431	1.91221	0.140597	2.0922	0.148372	0.663529	0.0709686	2.56517	0.171933	2.36403	0.169324	3.07563	0.196504	2.08483	0.159127	3.06204	0.209598	3.25506	0.217011	3.48851	0.225605	4.21242	0.260231
		5.265	0.3327	0.218039	0.031488	0.807107	0.0974697	1.68106	0.167672	2.97767	0.242365	4.90135	0.321836	7.75534	0.406391	9	0.43718	9	0.436278					1.12774	0.100102	0.940686	0.0903306	1.92575	0.141876	2.10575	0.149613	0.666803	0.0712401	2.59677	0.175035	2.37035	0.169925	3.08555	0.197473	2.08979	0.159727	3.07445	0.210878	3.26149	0.21767	3.49764	0.226574	4.22708	0.261801
		5.293	0.334	0.218076	0.0314953	0.807272	0.0974929	1.68147	0.167713	2.97851	0.242426	4.90295	0.32192	7.75825	0.406499	IsoLine	IsoLine	9	0.438082					1.13023	0.10054	0.942623	0.0906554	1.93408	0.142949	2.11407	0.150653	0.668817	0.0714677	2.61619	0.177635	2.37424	0.170429	3.09166	0.198286	2.09284	0.160231	3.08208	0.21195	3.26544	0.218223	3.50326	0.227387	4.23609	0.263117
		5.347	0.336	0.218099	0.0315031	0.807373	0.0975179	1.68171	0.167758	2.97903	0.242493	4.90394	0.32201	7.76004	0.406617			8.99999	0.438082					1.13106	0.100877	0.943268	0.0909051	1.93686	0.143774	2.11686	0.151453	0.669492	0.0716428	2.62268	0.179635	2.37554	0.170817	3.0937	0.198911	2.09385	0.160618	3.08463	0.212775	3.26676	0.218648	3.50513	0.228011	4.2391	0.264129
		5.284	0.33435	0.218107	0.0315113	0.807407	0.097544	1.6818	0.167804	2.97921	0.242562	4.90427	0.322105	7.76065	0.40674			8.2367	0.420178					ErrEll	ErrEll	ErrEll	ErrEll	ErrEll	ErrEll	ErrEll	ErrEll	ErrEll	ErrEll	ErrEll	ErrEll	ErrEll	ErrEll	ErrEll	ErrEll	ErrEll	ErrEll	ErrEll	ErrEll	ErrEll	ErrEll	ErrEll	ErrEll	ErrEll	ErrEll
		5.285	0.3351	ConcTikEll	ConcTikEll	ConcTikEll	ConcTikEll	ConcTikEll	ConcTikEll	ConcTikEll	ConcTikEll	ConcTikEll	ConcTikEll	ConcTikEll	ConcTikEll			7.53167	0.402497
		5.346	0.3367															6.88046	0.385037
		5.264	0.3377															6.27895	0.367793
		5.351	0.3354															5.72335	0.350764
		5.316	0.3363															5.21016	0.333948
		5.373	0.3378															4.73615	0.31734
		5.389	0.3397															4.29831	0.30094
		5.297	0.3372															3.8939	0.284743
		5.324	0.3391															3.52035	0.268749
		4.75	0.3152															3.17532	0.252953
		5.443	0.3439															2.85662	0.237354
		5.136	0.3249															2.56225	0.221949
		5.436	0.3436															2.29034	0.206736
		5.483	0.3458															2.03919	0.191712
		5.427	0.3452															1.80721	0.176876
		5.449	0.3468															1.59294	0.162224
		5.52	0.34817															1.39503	0.147755
		5.474	0.3498															1.21222	0.133465
		5.588	0.3568															1.04336	0.119354
		4.599	0.2912															0.887391	0.105418
		4.357	0.2784															0.743328	0.0916558
		0.583	0.068															0.610262	0.0780649
		5.95	0.377															0.487352	0.0646432
		2.482	0.1871															0.373824	0.0513886
		0.75	0.0783															0.268961	0.0382991
		0.767	0.0794															0.172102	0.0253724
		0.808	0.0814															0.0826367	0.0126068
		0.957	0.0911															0	0
		1.466	0.1235															0	0
		1.107	0.1006															ConcBand	ConcBand
		1.206	0.1049
		6.84	0.4359
		1.377	0.1125
		1.87	0.133
		IsoLine	IsoLine
[truncated: 112 more columns]

## Sheet: PlotDat7
Source sheet	all data NEW	5.083	0.3233	200		600		1000		1400		1800		0	0	0	0	0.217708	0.0315113	0	0.0360748	5.15276	0.3276	5.17454	0.327789	5.34413	0.336016	5.22366	0.331689	5.32686	0.335236	5.34513	0.33467	5.39886	0.339046	5.3451	0.336697	5.45486	0.341167	5.45886	0.342446	5.28991	0.33557	5.36291	0.33766	5.36521	0.33841	5.49386	0.343495
Plot name	Concordia4	5.106	0.3236	0.218107	0.0315113	0.807407	0.097544	1.6818	0.167804	2.97921	0.242562	4.90427	0.322105	0.0743382	0.0113583	0.0743382	0.0113386	0.805631	0.097544	7	0.430802	5.1514	0.327921	5.1732	0.328103	5.34219	0.33651	5.2222	0.332002	5.324	0.335831	5.3432	0.33505	5.396	0.339649	5.342	0.337342	5.452	0.341787	5.456	0.343049	5.288	0.33595	5.361	0.338032	5.3638	0.33874	5.49101	0.344057
Plot Type	1	5.245	0.3294	0.218099	0.0315195	0.807373	0.0975701	1.68171	0.16785	2.97903	0.24263	4.90394	0.322199	0.154203	0.0228457	0.154203	0.0228057	1.67741	0.167804			5.1474	0.328065	5.16927	0.328243	5.33651	0.336732	5.21793	0.332143	5.31561	0.336098	5.33754	0.335221	5.3876	0.33992	5.33291	0.337631	5.4436	0.342064	5.4476	0.34332	5.28241	0.336121	5.35541	0.338198	5.35966	0.338888	5.48261	0.344309
1st free col	153	5.149	0.3275	0.218076	0.0315273	0.807272	0.0975952	1.68147	0.167895	2.97851	0.242697	4.90295	0.32229	0.240004	0.0344635	0.240004	0.0344029	2.97009	0.242562			5.14093	0.328027	5.16292	0.328205	5.32731	0.336671	5.21101	0.332106	5.302	0.336026	5.32836	0.335175	5.374	0.339848	5.31817	0.337554	5.42999	0.34199	5.434	0.343248	5.27334	0.336075	5.34634	0.338154	5.35297	0.338848	5.46901	0.344242
Sigma Level	2	5.18	0.3273	0.218039	0.0315346	0.807107	0.0976184	1.68106	0.167936	2.97767	0.242758	4.90135	0.322373	0.332184	0.0462133	0.332184	0.0461315	4.8869	0.322105			5.13224	0.327806	5.15438	0.32799	5.31495	0.336331	5.20171	0.331891	5.2837	0.33562	5.31601	0.334916	5.3557	0.339435	5.29834	0.337113	5.41169	0.341566	5.4157	0.342835	5.26114	0.335816	5.33415	0.3379	5.34397	0.338621	5.45072	0.343858
Absolute Errs	TRUE	5.246	0.3296	0.21799	0.0315409	0.806887	0.0976386	1.68051	0.167972	2.97654	0.242811	4.89919	0.322447	0.431216	0.0580966	0.431216	0.0579932	IsoLine	IsoLine			5.12165	0.327412	5.14397	0.327607	5.2999	0.335725	5.19038	0.331507	5.26142	0.334893	5.30097	0.334452	5.33342	0.338699	5.27421	0.336326	5.38941	0.340809	5.39342	0.342099	5.24629	0.335352	5.31929	0.337446	5.33301	0.338218	5.42844	0.343172
Symbol Type	1	5.252	0.331	0.217929	0.0315461	0.806617	0.0976553	1.67985	0.168001	2.97516	0.242855	4.89655	0.322507	0.53761	0.0701148	0.53761	0.0699893					5.10958	0.32686	5.13211	0.327069	5.28274	0.334876	5.17746	0.33097	5.23601	0.333875	5.28382	0.333801	5.30801	0.337666	5.24668	0.335223	5.364	0.339749	5.36801	0.341066	5.22935	0.334701	5.30236	0.33681	5.32051	0.337652	5.40303	0.342211
Inverse Plot	FALSE	5.186	0.3281	0.21786	0.03155	0.80631	0.0976676	1.67909	0.168023	2.97358	0.242888	4.89355	0.322551	0.651913	0.0822695	0.651913	0.0821215					5.09648	0.326172	5.11925	0.326398	5.26413	0.333816	5.16345	0.330299	5.20845	0.332605	5.26522	0.33299	5.28044	0.336378	5.21682	0.333847	5.33643	0.338425	5.34044	0.339778	5.21098	0.33389	5.28398	0.336016	5.30696	0.336945	5.37547	0.341011
Color Plot	TRUE	5.308	0.3329	0.217785	0.0315524	0.805977	0.0976753	1.67827	0.168037	2.97187	0.242908	4.89029	0.322579	0.774713	0.0945623	0.774713	0.0943912					5.08287	0.325373	5.10588	0.32562	5.24479	0.332587	5.14889	0.329521	5.17979	0.33113	5.24587	0.332048	5.25179	0.334883	5.18578	0.332249	5.30778	0.336888	5.31179	0.338283	5.19187	0.332947	5.26488	0.335094	5.29287	0.336126	5.34682	0.339618
3D plot	FALSE	5.312	0.3344	0.217708	0.0315532	0.805631	0.0976778	1.67741	0.168041	2.97009	0.242915	4.8869	0.322588	0.906642	0.106995	0.906642	0.1068					5.06927	0.324494	5.09251	0.324764	5.22545	0.331235	5.13432	0.328665	5.15115	0.329508	5.22654	0.331011	5.22314	0.333238	5.15474	0.330492	5.27913	0.335199	5.28314	0.336638	5.17277	0.331911	5.24578	0.334081	5.27879	0.335225	5.31817	0.338087
Linear	FALSE	5.192	0.3305	0.21763	0.0315524	0.805284	0.0976753	1.67655	0.168037	2.96832	0.242908	4.88351	0.322579	1.04838	0.119568	1.04838	0.11935					5.05619	0.32357	5.07966	0.323863	5.20687	0.329812	5.12033	0.327764	5.12361	0.327801	5.20795	0.329921	5.1956	0.331508	5.12491	0.328643	5.25159	0.333421	5.2556	0.334908	5.15441	0.330821	5.22742	0.333014	5.26525	0.334277	5.29063	0.336475
Data Range	D3:G67	5.265	0.3327	0.217555	0.03155	0.804951	0.0976676	1.67573	0.168023	2.96661	0.242888	4.88026	0.322551	1.20065	0.132285	1.20065	0.132041					5.04414	0.322635	5.06782	0.322952	5.18975	0.328374	5.10743	0.326853	5.09823	0.326075	5.19082	0.328818	5.17023	0.329758	5.09742	0.326773	5.22622	0.331623	5.23023	0.333158	5.1375	0.329718	5.2105	0.331936	5.25278	0.333318	5.26525	0.334845
Filled Symbols	TRUE	5.293	0.334	0.217486	0.0315461	0.804644	0.0976553	1.67497	0.168001	2.96503	0.242855	4.87725	0.322507	1.36424	0.145146	1.36424	0.144877					5.03358	0.321725	5.05745	0.322066	5.17475	0.326975	5.09613	0.325967	5.076	0.324396	5.17581	0.327746	5.148	0.328056	5.07334	0.324954	5.20399	0.329874	5.208	0.331456	5.12268	0.328646	5.19568	0.330886	5.24185	0.332385	5.24302	0.333259
ConcAge	FALSE	5.347	0.336	0.217425	0.0315409	0.804375	0.0976386	1.67431	0.167972	2.96365	0.242811	4.87462	0.322447	1.54	0.158153	1.54	0.157858					5.02493	0.320877	5.04895	0.321239	5.16246	0.32567	5.08686	0.32514	5.05777	0.322829	5.1635	0.326744	5.12977	0.326467	5.05359	0.323257	5.18576	0.328242	5.18977	0.329867	5.11052	0.327644	5.18352	0.329907	5.23289	0.331515	5.22478	0.331779
ConcSwap	FALSE	5.284	0.33435	0.217376	0.0315346	0.804154	0.0976184	1.67376	0.167936	2.96252	0.242758	4.87246	0.322373	1.72882	0.171307	1.72882	0.170987					5.0185	0.320121	5.04263	0.320502	5.15333	0.324507	5.07998	0.324403	5.04424	0.321434	5.15436	0.325853	5.11623	0.325052	5.03892	0.321745	5.17223	0.326788	5.17623	0.328452	5.10149	0.326753	5.1745	0.329034	5.22624	0.330739	5.21124	0.33046
1st Symbol-row	1	5.285	0.3351	0.217339	0.0315273	0.80399	0.0975952	1.67336	0.167895	2.96168	0.242697	4.87085	0.32229	1.93167	0.184611	1.93167	0.184264					5.01455	0.319487	5.03876	0.319885	5.14773	0.323533	5.07576	0.323786	5.03592	0.320264	5.14875	0.325105	5.10792	0.323866	5.02991	0.320477	5.16391	0.32557	5.16792	0.327266	5.09595	0.326005	5.16895	0.328303	5.22215	0.33009	5.20292	0.329355
		5.346	0.3367	0.217316	0.0315195	0.803889	0.0975701	1.67311	0.16785	2.96116	0.24263	4.86987	0.322199	2.14961	0.198067	2.14961	0.197692					5.01324	0.319	5.03746	0.319411	5.14587	0.322784	5.07434	0.323311	5.03314	0.319364	5.14687	0.32453	5.10514	0.322954	5.0269	0.319503	5.16114	0.324633	5.16514	0.326354	5.09409	0.32543	5.16709	0.32774	5.22079	0.32959	5.20014	0.328505
		5.264	0.3377	0.217308	0.0315113	0.803855	0.097544	1.67302	0.167804	2.96098	0.242562	4.86953	0.322105	2.38374	0.211675	2.38374	0.211272					5.0146	0.318679	5.0388	0.319097	5.14781	0.32229	5.0758	0.322998	5.036	0.318769	5.1488	0.32415	5.108	0.322351	5.03	0.318858	5.164	0.324013	5.168	0.325751	5.096	0.32505	5.169	0.327368	5.2222	0.32926	5.20299	0.327943
		5.351	0.3354	0.217316	0.0315031	0.803889	0.0975179	1.67311	0.167758	2.96116	0.242493	4.86987	0.32201	2.63528	0.225437	2.63528	0.225006					5.0186	0.318535	5.04273	0.318957	5.15349	0.322068	5.08007	0.322857	5.04439	0.318502	5.15446	0.323979	5.1164	0.32208	5.03909	0.318569	5.1724	0.323736	5.1764	0.32548	5.10159	0.324879	5.17459	0.327202	5.22634	0.329112	5.21139	0.327691
		5.316	0.3363	0.217339	0.0314953	0.80399	0.0974929	1.67336	0.167713	2.96168	0.242426	4.87085	0.32192	2.90552	0.239356	2.90552	0.238896					5.02507	0.318573	5.04908	0.318995	5.16269	0.322129	5.08699	0.322894	5.058	0.318574	5.16364	0.324025	5.13	0.322152	5.05383	0.318646	5.18601	0.32381	5.19	0.325552	5.11066	0.324925	5.18366	0.327246	5.23303	0.329152	5.22499	0.327758
		5.373	0.3378	0.217376	0.031488	0.804154	0.0974697	1.67376	0.167672	2.96252	0.242365	4.87246	0.321836	3.19585	0.253433	3.19585	0.252943					5.03376	0.318794	5.05762	0.31921	5.17505	0.322469	5.09629	0.323109	5.0763	0.31898	5.17599	0.324284	5.1483	0.322565	5.07366	0.319087	5.20431	0.324234	5.2083	0.325965	5.12286	0.325184	5.19585	0.3275	5.24203	0.329379	5.24328	0.328142
		5.389	0.3397	0.217425	0.0314817	0.804375	0.0974495	1.67431	0.167636	2.96365	0.242312	4.87462	0.321763	3.50777	0.26767	3.50777	0.26715					5.04435	0.319188	5.06803	0.319593	5.1901	0.323075	5.10762	0.323493	5.09858	0.319707	5.19103	0.324748	5.17058	0.323301	5.09779	0.319874	5.22659	0.324991	5.23058	0.326701	5.13771	0.325648	5.21071	0.327954	5.25299	0.329782	5.26556	0.328828
		5.297	0.3372	0.217486	0.0314764	0.804644	0.0974328	1.67497	0.167607	2.96503	0.242268	4.87725	0.321703	3.84287	0.282069	3.84287	0.281518					5.05642	0.31974	5.07989	0.320131	5.20726	0.323924	5.12054	0.32403	5.12399	0.320725	5.20818	0.325399	5.19599	0.324334	5.12532	0.320977	5.252	0.326051	5.25599	0.327734	5.15465	0.326299	5.22764	0.32859	5.26549	0.330348	5.29097	0.329789
		5.324	0.3391	0.217555	0.0314726	0.804951	0.0974205	1.67573	0.167585	2.96661	0.242235	4.88026	0.321658	4.20288	0.296631	4.20288	0.296048					5.06952	0.320428	5.09275	0.320802	5.22587	0.324984	5.13455	0.324701	5.15155	0.321995	5.22678	0.32621	5.22356	0.325622	5.15518	0.322353	5.27957	0.327375	5.28356	0.329022	5.17302	0.32711	5.24602	0.329384	5.27904	0.331055	5.31853	0.330989
		5.443	0.3439	0.21763	0.0314702	0.805284	0.0974128	1.67655	0.167571	2.96832	0.242215	4.88351	0.321631	4.58965	0.311359	4.58965	0.310744					5.08313	0.321227	5.10612	0.32158	5.24521	0.326213	5.14911	0.325479	5.18021	0.32347	5.24613	0.327152	5.25221	0.327117	5.18622	0.323951	5.30822	0.328912	5.31221	0.330517	5.19213	0.328053	5.26512	0.330306	5.29313	0.331874	5.34718	0.332382
		5.136	0.3249	0.217708	0.0314694	0.805631	0.0974103	1.67741	0.167567	2.97009	0.242208	4.8869	0.321621	5.00517	0.326254	5.00517	0.325606					5.09673	0.322106	5.11949	0.322436	5.26455	0.327565	5.16368	0.326335	5.20885	0.325092	5.26546	0.328189	5.28086	0.328762	5.21726	0.325708	5.33687	0.330601	5.34086	0.332162	5.21123	0.329089	5.28422	0.331319	5.30721	0.332775	5.37583	0.333913
		5.436	0.3436	0.217785	0.0314702	0.805977	0.0974128	1.67827	0.167571	2.97187	0.242215	4.89029	0.321631	5.45159	0.341318	5.45159	0.340636					5.10981	0.32303	5.13234	0.323337	5.28313	0.328988	5.17767	0.327236	5.23639	0.326799	5.28405	0.329279	5.3084	0.330492	5.24709	0.327557	5.36441	0.332379	5.3684	0.333892	5.22959	0.330179	5.30258	0.332386	5.32075	0.333723	5.40337	0.335525
		5.483	0.3458	0.21786	0.0314726	0.80631	0.0974205	1.67909	0.167585	2.97358	0.242235	4.89355	0.321658	5.93119	0.356553	5.93119	0.355837					5.12186	0.323965	5.14418	0.324248	5.30025	0.330426	5.19057	0.328147	5.26177	0.328525	5.30118	0.330382	5.33377	0.332242	5.27458	0.329427	5.38978	0.334177	5.39377	0.335642	5.2465	0.331282	5.3195	0.333464	5.33322	0.334682	5.42875	0.337155
		5.427	0.3452	0.217929	0.0314764	0.806617	0.0974328	1.67985	0.167607	2.97516	0.242268	4.89655	0.321703	6.44644	0.371961	6.44644	0.37121					5.13242	0.324875	5.15455	0.325134	5.31525	0.331825	5.20187	0.329033	5.284	0.330204	5.31619	0.331454	5.356	0.333944	5.29866	0.331246	5.41201	0.335926	5.416	0.337344	5.26132	0.332354	5.33432	0.334514	5.34415	0.335615	5.45098	0.338741
		5.449	0.3468	0.21799	0.0314817	0.806887	0.0974495	1.68051	0.167636	2.97654	0.242312	4.89919	0.321763	6.99999	0.387544	6.99999	0.386758					5.14107	0.325723	5.16305	0.325961	5.32754	0.33313	5.21114	0.32986	5.30223	0.331771	5.3285	0.332456	5.37423	0.335533	5.31841	0.332943	5.43024	0.337558	5.43423	0.338933	5.27348	0.333356	5.34648	0.335493	5.35311	0.336485	5.46922	0.340221
		5.52	0.34817	0.218039	0.031488	0.807107	0.0974697	1.68106	0.167672	2.97767	0.242365	4.90135	0.321836	7	0.387544	7	0.386758					5.1475	0.326479	5.16937	0.326698	5.33667	0.334293	5.21802	0.330597	5.31576	0.333166	5.33764	0.333347	5.38777	0.336948	5.33308	0.334455	5.44377	0.339012	5.44777	0.340348	5.28251	0.334247	5.3555	0.336366	5.35976	0.337261	5.48276	0.34154
		5.474	0.3498	0.218076	0.0314953	0.807272	0.0974929	1.68147	0.167713	2.97851	0.242426	4.90295	0.32192	IsoLine	IsoLine	7	0.388331					5.15145	0.327113	5.17324	0.327315	5.34227	0.335267	5.22224	0.331214	5.32408	0.334336	5.34325	0.334095	5.39608	0.338134	5.34209	0.335723	5.45209	0.34023	5.45608	0.341534	5.28805	0.334995	5.36105	0.337097	5.36385	0.33791	5.49108	0.342645
		5.588	0.3568	0.218099	0.0315031	0.807373	0.0975179	1.68171	0.167758	2.97903	0.242493	4.90394	0.32201			6.99999	0.388331					5.15276	0.3276	5.17454	0.327789	5.34413	0.336016	5.22366	0.331689	5.32686	0.335236	5.34513	0.33467	5.39886	0.339046	5.3451	0.336697	5.45486	0.341167	5.45886	0.342446	5.28991	0.33557	5.36291	0.33766	5.36521	0.33841	5.49386	0.343495
		4.599	0.2912	0.218107	0.0315113	0.807407	0.097544	1.6818	0.167804	2.97921	0.242562	4.90427	0.322105			6.44644	0.372712					ErrEll	ErrEll	ErrEll	ErrEll	ErrEll	ErrEll	ErrEll	ErrEll	ErrEll	ErrEll	ErrEll	ErrEll	ErrEll	ErrEll	ErrEll	ErrEll	ErrEll	ErrEll	ErrEll	ErrEll	ErrEll	ErrEll	ErrEll	ErrEll	ErrEll	ErrEll	ErrEll	ErrEll
		4.357	0.2784	ConcTikEll	ConcTikEll	ConcTikEll	ConcTikEll	ConcTikEll	ConcTikEll	ConcTikEll	ConcTikEll	ConcTikEll	ConcTikEll			5.93119	0.357269
		0.583	0.068													5.45159	0.341999
		2.482	0.1871													5.00517	0.326902
		0.75	0.0783													4.58965	0.311974
		0.767	0.0794													4.20288	0.297214
		0.808	0.0814													3.84287	0.28262
		0.957	0.0911													3.50777	0.268191
		1.466	0.1235													3.19585	0.253923
		1.107	0.1006													2.90552	0.239817
		1.206	0.1049													2.63528	0.225868
		1.377	0.1125													2.38374	0.212077
		1.87	0.133													2.14961	0.198441
		1.087	0.0979													1.93167	0.184959
		0.909	0.0887													1.72882	0.171628
		1.79	0.1365													1.54	0.158447
		1.97	0.1444													1.36424	0.145414
		0.634	0.0701													1.20065	0.132528
		2.28	0.162													1.04838	0.119787
		2.307	0.1674													0.906642	0.107189
		2.986	0.1934													0.774713	0.0947335
		2.04	0.1572													0.651913	0.0824176
		2.95	0.2055													0.53761	0.0702403
		3.197	0.2149													0.431216	0.0582
		3.406	0.2225													0.332184	0.0462951
		4.08	0.2552													0.240004	0.0345242
		3.85	0.2478													0.154203	0.0228857
		0.544	0.0675													0.0743382	0.0113781
		4.357	0.2765													0	0
		4.215	0.2737													0	0
		4.421	0.2852													ConcBand	ConcBand
		4.43	0.2916
		IsoLine	IsoLine
[truncated: 104 more columns]

## Sheet: PlotDat2
Source sheet	all data NEW	0.583	0.068	200		600		1000		1400		1800		0	0	0	0	0.217708	0.0315113	0	0.036765	0.609925	0.0684461	0.780597	0.0800911	0.823298	0.0829334	0.854507	0.08427	0.993716	0.0935461	1.1633	0.103861	1.30881	0.110744	1.53943	0.127977	1.47736	0.116991	2.60194	0.194835	2.04134	0.143104	5.62086	0.353977	4.49163	0.284046	5.43163	0.345115
Plot name	Concordia2	0.75	0.0783	0.218107	0.0315113	0.807407	0.097544	1.6818	0.167804	2.97921	0.242562	4.90427	0.322105	0.0743382	0.0113583	0.0743382	0.0113386	0.805631	0.097544	7	0.42883	0.609403	0.0687354	0.780004	0.0801352	0.822212	0.0829308	0.853606	0.0843368	0.99301	0.0935164	1.16221	0.103903	1.30682	0.110749	1.53801	0.128023	1.47542	0.11714	2.59961	0.195049	2.03804	0.143114	5.61802	0.354668	4.48902	0.284332	5.42903	0.345119
Plot Type	1	0.767	0.0794	0.218099	0.0315195	0.807373	0.0975701	1.68171	0.16785	2.97903	0.24263	4.90394	0.322199	0.154203	0.0228457	0.154203	0.0228057	1.67741	0.167804			0.607866	0.0689966	0.778259	0.0801089	0.819005	0.0827925	0.850952	0.0842907	0.990919	0.0933938	1.159	0.103818	1.30097	0.110529	1.53383	0.127896	1.4697	0.117112	2.59276	0.194957	2.02828	0.142736	5.60964	0.355172	4.48135	0.28439	5.42136	0.344818
1st free col	153	0.808	0.0814	0.218076	0.0315273	0.807272	0.0975952	1.68147	0.167895	2.97851	0.242697	4.90295	0.32229	0.240004	0.0344635	0.240004	0.0344029	2.97009	0.242562			0.605373	0.0692194	0.775427	0.080013	0.813799	0.0825238	0.846648	0.0841336	0.987525	0.0931831	1.15379	0.103609	1.29146	0.110093	1.52703	0.127599	1.46041	0.116905	2.58166	0.194564	2.01243	0.141984	5.59605	0.35547	4.46889	0.284218	5.40891	0.344224
Sigma Level	2	0.957	0.0911	0.218039	0.0315346	0.807107	0.0976184	1.68106	0.167936	2.97767	0.242758	4.90135	0.322373	0.332184	0.0462133	0.332184	0.0461315	4.8869	0.322105			0.602021	0.0693953	0.771619	0.0798513	0.806794	0.0821351	0.840858	0.0838714	0.982958	0.0928923	1.14679	0.103285	1.27867	0.109458	1.5179	0.127145	1.44793	0.11653	2.56673	0.193883	1.99111	0.140887	5.57777	0.35555	4.45214	0.283822	5.39216	0.34336
Absolute Errs	TRUE	1.107	0.1006	0.21799	0.0315409	0.806887	0.0976386	1.68051	0.167972	2.97654	0.242811	4.89919	0.322447	0.431216	0.0580966	0.431216	0.0579932	IsoLine	IsoLine			0.597938	0.0695177	0.766979	0.07963	0.79826	0.0816413	0.833806	0.0835142	0.977394	0.0925326	1.13825	0.102858	1.26309	0.108647	1.50676	0.12655	1.43271	0.116	2.54854	0.192942	1.96514	0.139486	5.5555	0.355409	4.43172	0.283218	5.37176	0.34226
Symbol Type	1	1.206	0.1049	0.217929	0.0315461	0.806617	0.0976553	1.67985	0.168001	2.97516	0.242855	4.89655	0.322507	0.53761	0.0701148	0.53761	0.0699893					0.59328	0.0695817	0.761687	0.0793576	0.788525	0.0810613	0.825762	0.0830758	0.971045	0.0921179	1.12852	0.102344	1.24531	0.107693	1.49406	0.125839	1.41536	0.115335	2.52779	0.191776	1.93551	0.137836	5.5301	0.355052	4.40844	0.282429	5.34848	0.340965
Inverse Plot	FALSE	1.466	0.1235	0.21786	0.03155	0.80631	0.0976676	1.67909	0.168023	2.97358	0.242888	4.89355	0.322551	0.651913	0.0822695	0.651913	0.0821215					0.588228	0.0695849	0.755946	0.0790445	0.777963	0.0804175	0.817035	0.0825729	0.964157	0.091664	1.11795	0.101763	1.22602	0.106631	1.48029	0.125037	1.39653	0.114561	2.50528	0.190431	1.90337	0.136001	5.50254	0.354494	4.38318	0.281485	5.32322	0.339525
Color Plot	TRUE	1.377	0.1125	0.217785	0.0315524	0.805977	0.0976753	1.67827	0.168037	2.97187	0.242908	4.89029	0.322579	0.774713	0.0945623	0.774713	0.0943912					0.582975	0.0695272	0.749976	0.0787028	0.766979	0.0797346	0.807961	0.082025	0.956994	0.0911885	1.10697	0.101137	1.20597	0.105502	1.46596	0.124177	1.37695	0.113708	2.48188	0.188957	1.86994	0.13405	5.47389	0.353755	4.35692	0.280423	5.29695	0.337997
3D plot	FALSE	2.482	0.1871	0.217708	0.0315532	0.805631	0.0976778	1.67741	0.168041	2.97009	0.242915	4.8869	0.322588	0.906642	0.106995	0.906642	0.1068					0.577722	0.0694109	0.744008	0.0783457	0.755996	0.0790389	0.798889	0.0814531	0.949831	0.0907096	1.09599	0.10049	1.18591	0.10435	1.45163	0.12329	1.35737	0.112809	2.45848	0.187413	1.83651	0.132058	5.44524	0.352864	4.33065	0.279283	5.27069	0.336437
Linear	FALSE	1.87	0.133	0.21763	0.0315524	0.805284	0.0976753	1.67655	0.168037	2.96832	0.242908	4.88351	0.322579	1.04838	0.119568	1.04838	0.11935					0.572673	0.0692403	0.738269	0.0779867	0.745436	0.078357	0.790167	0.0808792	0.942944	0.0902457	1.08543	0.0998481	1.16663	0.10322	1.43786	0.122412	1.33854	0.111898	2.43599	0.185856	1.80437	0.130103	5.41769	0.351856	4.3054	0.278108	5.24544	0.334907
Data Range	D3:H67	5.474	0.3498	0.217555	0.03155	0.804951	0.0976676	1.67573	0.168023	2.96661	0.242888	4.88026	0.322551	1.20065	0.132285	1.20065	0.132041					0.56802	0.069022	0.732982	0.0776399	0.735705	0.0777152	0.78213	0.0803252	0.936597	0.0898146	1.0757	0.0992348	1.14886	0.102154	1.42517	0.121575	1.3212	0.11101	2.41527	0.184347	1.77476	0.128259	5.39231	0.350768	4.28214	0.276945	5.22217	0.333465
Filled Symbols	TRUE	4.357	0.2784	0.217486	0.0315461	0.804644	0.0976553	1.67497	0.168001	2.96503	0.242855	4.87725	0.322507	1.36424	0.145146	1.36424	0.144877					0.563943	0.0687645	0.728348	0.0773184	0.727176	0.0771381	0.775087	0.0798126	0.931034	0.0894329	1.06717	0.098674	1.13328	0.101194	1.41405	0.120812	1.306	0.110179	2.39711	0.182944	1.7488	0.126598	5.37007	0.349643	4.26175	0.275838	5.20177	0.332166
ConcAge	FALSE	5.297	0.3372	0.217425	0.0315409	0.804375	0.0976386	1.67431	0.167972	2.96365	0.242811	4.87462	0.322447	1.54	0.158153	1.54	0.157858					0.560598	0.0684776	0.724547	0.0770346	0.720178	0.076648	0.769309	0.0793609	0.926468	0.0891153	1.06017	0.0981871	1.1205	0.100376	1.40492	0.120153	1.29353	0.109437	2.38221	0.1817	1.7275	0.125182	5.35182	0.348525	4.24502	0.27483	5.18504	0.331061
ConcSwap	FALSE	5.136	0.3249	0.217376	0.0315346	0.804154	0.0976184	1.67376	0.167936	2.96252	0.242758	4.87246	0.322373	1.72882	0.171307	1.72882	0.170987					0.558115	0.0681723	0.721723	0.0767994	0.714979	0.0762636	0.765018	0.0789876	0.923076	0.0888739	1.05498	0.097793	1.11101	0.0997316	1.39814	0.119622	1.28426	0.108813	2.37114	0.180664	1.71168	0.124067	5.33827	0.347455	4.23259	0.273958	5.1726	0.330192
1st Symbol-row	1	5.427	0.3452	0.217339	0.0315273	0.80399	0.0975952	1.67336	0.167895	2.96168	0.242697	4.87085	0.32229	1.93167	0.184611	1.93167	0.184264					0.556587	0.0678605	0.719986	0.0766219	0.711779	0.0759998	0.762379	0.0787071	0.920988	0.0887181	1.05178	0.0975068	1.10516	0.0992861	1.39397	0.119241	1.27856	0.108331	2.36434	0.179876	1.70194	0.123295	5.32994	0.346475	4.22494	0.273258	5.16495	0.329592
		5.351	0.3354	0.217316	0.0315195	0.803889	0.0975701	1.67311	0.16785	2.96116	0.24263	4.86987	0.322199	2.14961	0.198067	2.14961	0.197692					0.556075	0.0675539	0.719403	0.0765089	0.710702	0.0758666	0.761493	0.07853	0.920284	0.0886539	1.0507	0.0973394	1.10319	0.0990563	1.39257	0.119023	1.27664	0.108009	2.36206	0.179365	1.69866	0.122896	5.32714	0.345623	4.22237	0.272754	5.16237	0.329285
		5.192	0.3305	0.217308	0.0315113	0.803855	0.097544	1.67302	0.167804	2.96098	0.242562	4.86953	0.322105	2.38374	0.211675	2.38374	0.211272					0.556597	0.0672646	0.719996	0.0764648	0.711788	0.0758692	0.762394	0.0784632	0.92099	0.0886836	1.05179	0.0972974	1.10518	0.0990512	1.39399	0.118977	1.27858	0.10786	2.36439	0.179151	1.70196	0.122886	5.32998	0.344932	4.22498	0.272468	5.16497	0.329281
		5.436	0.3436	0.217316	0.0315031	0.803889	0.0975179	1.67311	0.167758	2.96116	0.242493	4.86987	0.32201	2.63528	0.225437	2.63528	0.225006					0.558134	0.0670034	0.721741	0.0764911	0.714995	0.0760075	0.765048	0.0785093	0.923081	0.0888062	1.055	0.0973822	1.11103	0.0992708	1.39817	0.119104	1.2843	0.107888	2.37124	0.179243	1.71172	0.123264	5.33836	0.344428	4.23265	0.27241	5.17264	0.329582
		5.449	0.3468	0.217339	0.0314953	0.80399	0.0974929	1.67336	0.167713	2.96168	0.242426	4.87085	0.32192	2.90552	0.239356	2.90552	0.238896					0.560627	0.0667806	0.724573	0.076587	0.720201	0.0762762	0.769352	0.0786664	0.926475	0.0890169	1.06021	0.0975907	1.12054	0.0997067	1.40497	0.119401	1.29359	0.108095	2.38234	0.179636	1.72757	0.124016	5.35195	0.34413	4.24511	0.272582	5.18509	0.330176
		5.186	0.3281	0.217376	0.031488	0.804154	0.0974697	1.67376	0.167672	2.96252	0.242365	4.87246	0.321836	3.19585	0.253433	3.19585	0.252943					0.563979	0.0666047	0.728381	0.0767487	0.727206	0.0766649	0.775142	0.0789286	0.931042	0.0893077	1.06721	0.0979149	1.13333	0.100342	1.4141	0.119855	1.30607	0.10847	2.39727	0.180317	1.74889	0.125113	5.37023	0.34405	4.26186	0.272978	5.20184	0.33104
		5.316	0.3363	0.217425	0.0314817	0.804375	0.0974495	1.67431	0.167636	2.96365	0.242312	4.87462	0.321763	3.50777	0.26767	3.50777	0.26715					0.568062	0.0664823	0.733021	0.07697	0.73574	0.0771587	0.782194	0.0792858	0.936606	0.0896674	1.07575	0.0983422	1.14891	0.101153	1.42524	0.12045	1.32129	0.109	2.41546	0.181258	1.77486	0.126514	5.3925	0.344191	4.28228	0.273582	5.22224	0.33214
		5.265	0.3327	0.217486	0.0314764	0.804644	0.0974328	1.67497	0.167607	2.96503	0.242268	4.87725	0.321703	3.84287	0.282069	3.84287	0.281518					0.57272	0.0664183	0.738313	0.0772424	0.745475	0.0777387	0.790238	0.0797242	0.942955	0.0900821	1.08548	0.0988563	1.16669	0.102107	1.43794	0.121161	1.33864	0.109665	2.43621	0.182424	1.80449	0.128164	5.4179	0.344548	4.30556	0.274371	5.24552	0.333435
		5.284	0.33435	0.217555	0.0314726	0.804951	0.0974205	1.67573	0.167585	2.96661	0.242235	4.88026	0.321658	4.20288	0.296631	4.20288	0.296048					0.577772	0.0664151	0.744054	0.0775555	0.756037	0.0783825	0.798965	0.0802271	0.949843	0.090536	1.09605	0.0994375	1.18598	0.103169	1.45171	0.121963	1.35747	0.110439	2.45872	0.183769	1.83663	0.129999	5.44546	0.345106	4.33082	0.275315	5.27078	0.334875
		5.324	0.3391	0.21763	0.0314702	0.805284	0.0974128	1.67655	0.167571	2.96832	0.242215	4.88351	0.321631	4.58965	0.311359	4.58965	0.310744					0.583025	0.0664728	0.750024	0.0778972	0.767021	0.0790654	0.808039	0.080775	0.957006	0.0910115	1.10703	0.100063	1.20603	0.104298	1.46604	0.122823	1.37705	0.111292	2.48212	0.185243	1.87006	0.13195	5.47411	0.345845	4.35708	0.276377	5.29705	0.336403
		5.18	0.3273	0.217708	0.0314694	0.805631	0.0974103	1.67741	0.167567	2.97009	0.242208	4.8869	0.321621	5.00517	0.326254	5.00517	0.325606					0.588278	0.0665891	0.755992	0.0782543	0.778004	0.0797611	0.817111	0.0813469	0.964169	0.0914904	1.11801	0.10071	1.22609	0.10545	1.48037	0.12371	1.39663	0.112191	2.50552	0.186787	1.90349	0.133942	5.50276	0.346736	4.38335	0.277517	5.32331	0.337963
		5.285	0.3351	0.217785	0.0314702	0.805977	0.0974128	1.67827	0.167571	2.97187	0.242215	4.89029	0.321631	5.45159	0.341318	5.45159	0.340636					0.593327	0.0667597	0.761731	0.0786133	0.788564	0.080443	0.825833	0.0819208	0.971056	0.0919543	1.12857	0.101352	1.24537	0.10658	1.49414	0.124588	1.41546	0.113102	2.52801	0.188344	1.93563	0.135897	5.53031	0.347744	4.4086	0.278692	5.34856	0.339493
		5.52	0.34817	0.21786	0.0314726	0.80631	0.0974205	1.67909	0.167585	2.97358	0.242235	4.89355	0.321658	5.93119	0.356553	5.93119	0.355837					0.59798	0.066978	0.767018	0.0789601	0.798295	0.0810848	0.83387	0.0824748	0.977403	0.0923854	1.1383	0.101965	1.26314	0.107646	1.50683	0.125425	1.4328	0.11399	2.54873	0.189853	1.96524	0.137741	5.55569	0.348832	4.43186	0.279855	5.37183	0.340935
		5.149	0.3275	0.217929	0.0314764	0.806617	0.0974328	1.67985	0.167607	2.97516	0.242268	4.89655	0.321703	6.44644	0.371961	6.44644	0.37121					0.602057	0.0672355	0.771652	0.0792816	0.806824	0.0816619	0.840913	0.0829874	0.982966	0.0927671	1.14683	0.102526	1.27872	0.108606	1.51795	0.126188	1.448	0.114821	2.56689	0.191256	1.9912	0.139402	5.57793	0.349957	4.45225	0.280962	5.39223	0.342234
		5.443	0.3439	0.21799	0.0314817	0.806887	0.0974495	1.68051	0.167636	2.97654	0.242312	4.89919	0.321763	6.99999	0.387544	6.99999	0.386758					0.605402	0.0675224	0.775453	0.0795654	0.813822	0.082152	0.846691	0.0834391	0.987532	0.0930847	1.15383	0.103013	1.2915	0.109424	1.52708	0.126847	1.46047	0.115563	2.58179	0.1925	2.0125	0.140818	5.59618	0.351075	4.46898	0.28197	5.40896	0.343339
		5.588	0.3568	0.218039	0.031488	0.807107	0.0974697	1.68106	0.167672	2.97767	0.242365	4.90135	0.321836	7	0.387544	7	0.386758					0.607885	0.0678277	0.778277	0.0798006	0.819021	0.0825364	0.850982	0.0838124	0.990924	0.0933261	1.15902	0.103407	1.30099	0.110068	1.53386	0.127378	1.46974	0.116187	2.59286	0.193536	2.02832	0.141933	5.60973	0.352145	4.48141	0.282842	5.4214	0.344208
		5.293	0.334	0.218076	0.0314953	0.807272	0.0974929	1.68147	0.167713	2.97851	0.242426	4.90295	0.32192	IsoLine	IsoLine	7	0.388331					0.609413	0.0681395	0.780014	0.0799781	0.822221	0.0828002	0.853621	0.0840929	0.993012	0.0934819	1.16222	0.103693	1.30684	0.110514	1.53803	0.127759	1.47544	0.116669	2.59966	0.194324	2.03806	0.142705	5.61806	0.353125	4.48906	0.283542	5.42905	0.344808
		5.373	0.3378	0.218099	0.0315031	0.807373	0.0975179	1.68171	0.167758	2.97903	0.242493	4.90394	0.32201			6.99999	0.388331					0.609925	0.0684461	0.780597	0.0800911	0.823298	0.0829334	0.854507	0.08427	0.993716	0.0935461	1.1633	0.103861	1.30881	0.110744	1.53943	0.127977	1.47736	0.116991	2.60194	0.194835	2.04134	0.143104	5.62086	0.353977	4.49163	0.284046	5.43163	0.345115
		5.106	0.3236	0.218107	0.0315113	0.807407	0.097544	1.6818	0.167804	2.97921	0.242562	4.90427	0.322105			6.44644	0.372712					ErrEll	ErrEll	ErrEll	ErrEll	ErrEll	ErrEll	ErrEll	ErrEll	ErrEll	ErrEll	ErrEll	ErrEll	ErrEll	ErrEll	ErrEll	ErrEll	ErrEll	ErrEll	ErrEll	ErrEll	ErrEll	ErrEll	ErrEll	ErrEll	ErrEll	ErrEll	ErrEll	ErrEll
		5.483	0.3458	ConcTikEll	ConcTikEll	ConcTikEll	ConcTikEll	ConcTikEll	ConcTikEll	ConcTikEll	ConcTikEll	ConcTikEll	ConcTikEll			5.93119	0.357269
		5.346	0.3367													5.45159	0.341999
		5.389	0.3397													5.00517	0.326902
		5.347	0.336													4.58965	0.311974
		5.246	0.3296													4.20288	0.297214
		5.264	0.3377													3.84287	0.28262
		4.599	0.2912													3.50777	0.268191
		5.252	0.331													3.19585	0.253923
		5.083	0.3233													2.90552	0.239817
		5.312	0.3344													2.63528	0.225868
		5.308	0.3329													2.38374	0.212077
		5.245	0.3294													2.14961	0.198441
		0.544	0.0675													1.93167	0.184959
		0.634	0.0701													1.72882	0.171628
		0.909	0.0887													1.54	0.158447
		2.04	0.1572													1.36424	0.145414
		1.79	0.1365													1.20065	0.132528
		1.97	0.1444													1.04838	0.119787
		2.28	0.162													0.906642	0.107189
		2.307	0.1674													0.774713	0.0947335
		1.087	0.0979													0.651913	0.0824176
		2.95	0.2055													0.53761	0.0702403
		3.197	0.2149													0.431216	0.0582
		3.406	0.2225													0.332184	0.0462951
		4.43	0.2916													0.240004	0.0345242
		3.85	0.2478													0.154203	0.0228857
		4.215	0.2737													0.0743382	0.0113781
		4.421	0.2852													0	0
		2.986	0.1934													0	0
		4.357	0.2765													ConcBand	ConcBand
		4.08	0.2552
		IsoLine	IsoLine
[truncated: 104 more columns]

## Sheet: PlotDat8
Source sheet	all data NEW	0.583	0.068	200		600		1000		1400		1800		0	0	0	0	0.217708	0.0315113	0	0.0360748	0.609925	0.0694329	0.780597	0.0799534	0.823298	0.0825967	0.854507	0.0840456	0.993716	0.0933048	1.1633	0.103576	1.30881	0.11019	1.53943	0.127578	1.47736	0.116687	2.60194	0.194266	2.04134	0.142148	5.62086	0.354978	4.49163	0.283799	5.43163	0.344364
Plot name	Concordia5	0.75	0.0783	0.218107	0.0315113	0.807407	0.097544	1.6818	0.167804	2.97921	0.242562	4.90427	0.322105	0.0743382	0.0113583	0.0743382	0.0113386	0.805631	0.097544	7	0.430802	0.609401	0.0695403	0.78	0.0800772	0.822199	0.0828361	0.853599	0.0842437	0.992998	0.0934699	1.1622	0.103799	1.3068	0.110587	1.538	0.127884	1.47541	0.117002	2.59959	0.194802	2.038	0.142834	5.61803	0.355368	4.48902	0.284205	5.429	0.344901
Plot Type	1	0.767	0.0794	0.218099	0.0315195	0.807373	0.0975701	1.68171	0.16785	2.97903	0.24263	4.90394	0.322199	0.154203	0.0228457	0.154203	0.0228057	1.67741	0.167804			0.607862	0.0695885	0.778251	0.0801328	0.818979	0.0829435	0.850939	0.0843326	0.990897	0.0935438	1.15898	0.103899	1.30093	0.110765	1.5338	0.128021	1.46969	0.117143	2.59273	0.195042	2.02821	0.143142	5.60965	0.355543	4.48134	0.284387	5.42131	0.345142
1st free col	153	0.808	0.0814	0.218076	0.0315273	0.807272	0.0975952	1.68147	0.167895	2.97851	0.242697	4.90295	0.32229	0.240004	0.0344635	0.240004	0.0344029	2.97009	0.242562			0.605367	0.0695756	0.775416	0.080118	0.813762	0.0829147	0.846629	0.0843087	0.987493	0.0935239	1.15377	0.103872	1.29141	0.110718	1.527	0.127984	1.4604	0.117106	2.58161	0.194978	2.01233	0.14306	5.59606	0.355497	4.46888	0.284339	5.40884	0.345078
Sigma Level	2	0.957	0.0911	0.218039	0.0315346	0.807107	0.0976184	1.68106	0.167936	2.97767	0.242758	4.90135	0.322373	0.332184	0.0462133	0.332184	0.0461315	4.8869	0.322105			0.602013	0.0695022	0.771605	0.0800333	0.806747	0.0827508	0.840834	0.0841731	0.982917	0.0934108	1.14676	0.10372	1.2786	0.110447	1.51785	0.127775	1.4479	0.116892	2.56666	0.19461	1.99099	0.142591	5.57779	0.355232	4.45212	0.284063	5.39206	0.344711
Absolute Errs	TRUE	1.107	0.1006	0.21799	0.0315409	0.806887	0.0976386	1.68051	0.167972	2.97654	0.242811	4.89919	0.322447	0.431216	0.0580966	0.431216	0.0579932	IsoLine	IsoLine			0.597928	0.0693711	0.766963	0.079882	0.798205	0.0824582	0.833778	0.0839309	0.977345	0.0932089	1.13821	0.103448	1.26301	0.109963	1.50671	0.127402	1.43269	0.116509	2.54846	0.193954	1.965	0.141754	5.55552	0.354759	4.43171	0.28357	5.37164	0.344055
Symbol Type	1	1.206	0.1049	0.217929	0.0315461	0.806617	0.0976553	1.67985	0.168001	2.97516	0.242855	4.89655	0.322507	0.53761	0.0701148	0.53761	0.0699893					0.59327	0.0691873	0.761669	0.0796699	0.788463	0.082048	0.82573	0.0835915	0.970992	0.0929259	1.12847	0.103066	1.24522	0.109284	1.494	0.126879	1.41533	0.115972	2.52771	0.193034	1.93535	0.14058	5.53012	0.354095	4.40842	0.282877	5.34835	0.343136
Inverse Plot	FALSE	1.466	0.1235	0.21786	0.03155	0.80631	0.0976676	1.67909	0.168023	2.97358	0.242888	4.89355	0.322551	0.651913	0.0822695	0.651913	0.0821215					0.588217	0.0689578	0.755927	0.0794051	0.777897	0.0815361	0.817002	0.0831678	0.9641	0.0925728	1.11791	0.102589	1.22593	0.108437	1.48022	0.126226	1.3965	0.115302	2.5052	0.191887	1.9032	0.139115	5.50257	0.353266	4.38316	0.282013	5.32308	0.341989
Color Plot	TRUE	1.377	0.1125	0.217785	0.0315524	0.805977	0.0976753	1.67827	0.168037	2.97187	0.242908	4.89029	0.322579	0.774713	0.0945623	0.774713	0.0943912					0.582963	0.0686916	0.749957	0.0790979	0.766912	0.0809421	0.807927	0.0826762	0.956936	0.0921631	1.10692	0.102036	1.20587	0.107454	1.46589	0.125468	1.37692	0.114524	2.48179	0.190555	1.86976	0.137415	5.47391	0.352304	4.3569	0.28101	5.29682	0.340658
3D plot	FALSE	2.482	0.1871	0.217708	0.0315532	0.805631	0.0976778	1.67741	0.168041	2.97009	0.242915	4.8869	0.322588	0.906642	0.106995	0.906642	0.1068					0.577711	0.0683987	0.743989	0.07876	0.755931	0.0802888	0.798856	0.0821356	0.949774	0.0917125	1.09594	0.101428	1.18581	0.106373	1.45157	0.124634	1.35734	0.113668	2.4584	0.189091	1.83634	0.135546	5.44526	0.351246	4.33063	0.279906	5.27056	0.339194
Linear	FALSE	1.87	0.133	0.21763	0.0315524	0.805284	0.0976753	1.67655	0.168037	2.96832	0.242908	4.88351	0.322579	1.04838	0.119568	1.04838	0.11935					0.572662	0.0680906	0.738251	0.0784044	0.745375	0.0796014	0.790135	0.0815667	0.94289	0.0912384	1.08539	0.100788	1.16654	0.105235	1.4378	0.123757	1.33852	0.112767	2.43591	0.18755	1.80421	0.133578	5.41772	0.350132	4.30538	0.278745	5.24531	0.337653
Data Range	D3:G67	5.474	0.3498	0.217555	0.03155	0.804951	0.0976676	1.67573	0.168023	2.96661	0.242888	4.88026	0.322551	1.20065	0.132285	1.20065	0.132041					0.568011	0.0677789	0.732965	0.0780449	0.73565	0.0789062	0.782102	0.0809913	0.936549	0.090759	1.07566	0.100141	1.14878	0.104084	1.42511	0.12287	1.32117	0.111856	2.41519	0.185992	1.77461	0.131589	5.39233	0.349005	4.28212	0.27757	5.22205	0.336095
Filled Symbols	TRUE	4.357	0.2784	0.217486	0.0315461	0.804644	0.0976553	1.67497	0.168001	2.96503	0.242855	4.87725	0.322507	1.36424	0.145146	1.36424	0.144877					0.563935	0.0674758	0.728334	0.0776951	0.727129	0.07823	0.775063	0.0804317	0.930993	0.0902927	1.06714	0.0995113	1.13321	0.102965	1.414	0.122008	1.30598	0.11097	2.39704	0.184476	1.74868	0.129653	5.37009	0.347909	4.26173	0.276428	5.20167	0.334579
ConcAge	FALSE	5.297	0.3372	0.217425	0.0315409	0.804375	0.0976386	1.67431	0.167972	2.96365	0.242811	4.87462	0.322447	1.54	0.158153	1.54	0.157858					0.560592	0.0671928	0.724536	0.0773686	0.720141	0.0775988	0.76929	0.0799093	0.926436	0.0898574	1.06015	0.0989236	1.12045	0.10192	1.40488	0.121202	1.29351	0.110143	2.38216	0.183062	1.7274	0.127846	5.35184	0.346886	4.245	0.275361	5.18496	0.333164
ConcSwap	FALSE	5.136	0.3249	0.217376	0.0315346	0.804154	0.0976184	1.67376	0.167936	2.96252	0.242758	4.87246	0.322373	1.72882	0.171307	1.72882	0.170987					0.55811	0.0669408	0.721716	0.0770778	0.714954	0.0770368	0.765005	0.0794442	0.923054	0.0894698	1.05496	0.0984003	1.11097	0.10099	1.39812	0.120485	1.28425	0.109406	2.37111	0.181802	1.71161	0.126238	5.33828	0.345974	4.23258	0.27441	5.17255	0.331904
1st Symbol-row	1	5.427	0.3452	0.217339	0.0315273	0.80399	0.0975952	1.67336	0.167895	2.96168	0.242697	4.87085	0.32229	1.93167	0.184611	1.93167	0.184264					0.556585	0.0667296	0.719983	0.0768341	0.711767	0.0765656	0.762372	0.0790542	0.920977	0.0891449	1.05177	0.0979615	1.10514	0.100209	1.39396	0.119884	1.27855	0.108788	2.36432	0.180746	1.7019	0.124889	5.32994	0.34521	4.22494	0.273614	5.16492	0.330848
		5.351	0.3354	0.217316	0.0315195	0.803889	0.0975701	1.67311	0.16785	2.96116	0.24263	4.86987	0.322199	2.14961	0.198067	2.14961	0.197692					0.556075	0.0665671	0.719403	0.0766466	0.710702	0.0762033	0.761493	0.0787544	0.920284	0.0888952	1.0507	0.097624	1.10319	0.0996096	1.39257	0.119422	1.27664	0.108313	2.36206	0.179934	1.69866	0.123852	5.32714	0.344622	4.22237	0.273001	5.16237	0.330036
		5.192	0.3305	0.217308	0.0315113	0.803855	0.097544	1.67302	0.167804	2.96098	0.242562	4.86953	0.322105	2.38374	0.211675	2.38374	0.211272					0.556599	0.0664597	0.72	0.0765228	0.711801	0.0759639	0.762401	0.0785563	0.921002	0.0887301	1.0518	0.097401	1.1052	0.099213	1.394	0.119116	1.27859	0.107998	2.36441	0.179398	1.702	0.123166	5.32997	0.344232	4.22498	0.272595	5.165	0.329499
		5.436	0.3436	0.217316	0.0315031	0.803889	0.0975179	1.67311	0.167758	2.96116	0.242493	4.86987	0.32201	2.63528	0.225437	2.63528	0.225006					0.558138	0.0664115	0.721749	0.0764672	0.715021	0.0758565	0.765061	0.0784674	0.923103	0.0886562	1.05502	0.0973009	1.11107	0.099035	1.3982	0.118979	1.28431	0.107857	2.37127	0.179158	1.71179	0.122858	5.33835	0.344057	4.23266	0.272413	5.17269	0.329258
		5.449	0.3468	0.217339	0.0314953	0.80399	0.0974929	1.67336	0.167713	2.96168	0.242426	4.87085	0.32192	2.90552	0.239356	2.90552	0.238896					0.560633	0.0664244	0.724584	0.076482	0.720238	0.0758853	0.769371	0.0784913	0.926507	0.0886761	1.06023	0.0973276	1.12059	0.0990823	1.405	0.119016	1.2936	0.107894	2.38239	0.179222	1.72767	0.12294	5.35194	0.344103	4.24512	0.272461	5.18516	0.329322
		5.186	0.3281	0.217376	0.031488	0.804154	0.0974697	1.67376	0.167672	2.96252	0.242365	4.87246	0.321836	3.19585	0.253433	3.19585	0.252943					0.563987	0.0664978	0.728395	0.0765667	0.727253	0.0760492	0.775166	0.0786269	0.931083	0.0887892	1.06724	0.09748	1.1334	0.0993532	1.41415	0.119225	1.3061	0.108108	2.39734	0.17959	1.74901	0.123409	5.37021	0.344368	4.26188	0.272737	5.20194	0.329689
		5.316	0.3363	0.217425	0.0314817	0.804375	0.0974495	1.67431	0.167636	2.96365	0.242312	4.87462	0.321763	3.50777	0.26767	3.50777	0.26715					0.568072	0.0666289	0.733037	0.076718	0.735795	0.0763418	0.782222	0.0788691	0.936655	0.0889911	1.07579	0.0977524	1.14899	0.0998373	1.42529	0.119598	1.32131	0.108491	2.41554	0.180246	1.775	0.124246	5.39248	0.344841	4.28229	0.27323	5.22236	0.330345
		5.265	0.3327	0.217486	0.0314764	0.804644	0.0974328	1.67497	0.167607	2.96503	0.242268	4.87725	0.321703	3.84287	0.282069	3.84287	0.281518					0.57273	0.0668127	0.738331	0.0769301	0.745537	0.076752	0.79027	0.0792085	0.943008	0.0892741	1.08553	0.0981341	1.16678	0.100516	1.438	0.120121	1.33867	0.109028	2.43629	0.181166	1.80465	0.12542	5.41788	0.345505	4.30558	0.273923	5.24565	0.331264
		5.284	0.33435	0.217555	0.0314726	0.804951	0.0974205	1.67573	0.167585	2.96661	0.242235	4.88026	0.321658	4.20288	0.296631	4.20288	0.296048					0.577783	0.0670422	0.744073	0.0771949	0.756103	0.0772639	0.798998	0.0796322	0.9499	0.0896272	1.09609	0.0986107	1.18607	0.101363	1.45178	0.120774	1.3575	0.109698	2.4588	0.182313	1.8368	0.126885	5.44543	0.346334	4.33084	0.274787	5.27092	0.332411
		5.324	0.3391	0.21763	0.0314702	0.805284	0.0974128	1.67655	0.167571	2.96832	0.242215	4.88351	0.321631	4.58965	0.311359	4.58965	0.310744					0.583037	0.0673084	0.750043	0.0775021	0.767088	0.0778579	0.808073	0.0801238	0.957064	0.0900369	1.10708	0.0991636	1.20613	0.102346	1.46611	0.121532	1.37708	0.110476	2.48221	0.183645	1.87024	0.128585	5.47409	0.347296	4.3571	0.27579	5.29718	0.333742
		5.18	0.3273	0.217708	0.0314694	0.805631	0.0974103	1.67741	0.167567	2.97009	0.242208	4.8869	0.321621	5.00517	0.326254	5.00517	0.325606					0.588289	0.0676013	0.756011	0.07784	0.778069	0.0785112	0.817144	0.0806644	0.964226	0.0904875	1.11806	0.0997718	1.22619	0.103427	1.48043	0.122366	1.39666	0.111332	2.5056	0.185109	1.90366	0.130454	5.50274	0.348354	4.38337	0.276894	5.32344	0.335206
		5.285	0.3351	0.217785	0.0314702	0.805977	0.0974128	1.67827	0.167571	2.97187	0.242215	4.89029	0.321631	5.45159	0.341318	5.45159	0.340636					0.593338	0.0679094	0.761749	0.0781956	0.788625	0.0791986	0.825865	0.0812333	0.97111	0.0909616	1.12861	0.100412	1.24546	0.104565	1.4942	0.123243	1.41548	0.112233	2.52809	0.18665	1.93579	0.132422	5.53028	0.349468	4.40862	0.278055	5.34869	0.336747
		5.52	0.34817	0.21786	0.0314726	0.80631	0.0974205	1.67909	0.167585	2.97358	0.242235	4.89355	0.321658	5.93119	0.356553	5.93119	0.355837					0.597989	0.0682211	0.767035	0.0785551	0.79835	0.0798938	0.833898	0.0818087	0.977451	0.091441	1.13834	0.101059	1.26322	0.105716	1.50689	0.12413	1.43283	0.113144	2.54881	0.188208	1.96539	0.134411	5.55567	0.350595	4.43188	0.27923	5.37195	0.338305
		5.149	0.3275	0.217929	0.0314764	0.806617	0.0974328	1.67985	0.167607	2.97516	0.242268	4.89655	0.321703	6.44644	0.371961	6.44644	0.37121					0.602065	0.0685242	0.771666	0.0789049	0.806871	0.08057	0.840937	0.0823683	0.983007	0.0919073	1.14686	0.101689	1.27879	0.106835	1.518	0.124992	1.44802	0.11403	2.56696	0.189724	1.99132	0.136347	5.57791	0.351691	4.45227	0.280372	5.39233	0.339821
		5.443	0.3439	0.21799	0.0314817	0.806887	0.0974495	1.68051	0.167636	2.97654	0.242312	4.89919	0.321763	6.99999	0.387544	6.99999	0.386758					0.605408	0.0688072	0.775464	0.0792314	0.813859	0.0812012	0.84671	0.0828907	0.987564	0.0923426	1.15385	0.102276	1.29155	0.10788	1.52712	0.125798	1.46049	0.114857	2.58184	0.191138	2.0126	0.138154	5.59616	0.352714	4.469	0.281439	5.40904	0.341236
		5.588	0.3568	0.218039	0.031488	0.807107	0.0974697	1.68106	0.167672	2.97767	0.242365	4.90135	0.321836	7	0.387544	7	0.386758					0.60789	0.0690592	0.778284	0.0795222	0.819046	0.0817632	0.850995	0.0833558	0.990946	0.0927302	1.15904	0.1028	1.30103	0.10881	1.53388	0.126515	1.46975	0.115594	2.59289	0.192398	2.02839	0.139762	5.60972	0.353626	4.48142	0.28239	5.42145	0.342496
		5.293	0.334	0.218076	0.0314953	0.807272	0.0974929	1.68147	0.167713	2.97851	0.242426	4.90295	0.32192	IsoLine	IsoLine	7	0.388331					0.609415	0.0692704	0.780017	0.0797659	0.822233	0.0822344	0.853628	0.0837458	0.993023	0.0930551	1.16223	0.103239	1.30686	0.109591	1.53804	0.127116	1.47545	0.116212	2.59968	0.193454	2.0381	0.141111	5.61806	0.35439	4.48906	0.283186	5.42908	0.343552
		5.373	0.3378	0.218099	0.0315031	0.807373	0.0975179	1.68171	0.167758	2.97903	0.242493	4.90394	0.32201			6.99999	0.388331					0.609925	0.0694329	0.780597	0.0799534	0.823298	0.0825967	0.854507	0.0840456	0.993716	0.0933048	1.1633	0.103576	1.30881	0.11019	1.53943	0.127578	1.47736	0.116687	2.60194	0.194266	2.04134	0.142148	5.62086	0.354978	4.49163	0.283799	5.43163	0.344364
		5.106	0.3236	0.218107	0.0315113	0.807407	0.097544	1.6818	0.167804	2.97921	0.242562	4.90427	0.322105			6.44644	0.372712					ErrEll	ErrEll	ErrEll	ErrEll	ErrEll	ErrEll	ErrEll	ErrEll	ErrEll	ErrEll	ErrEll	ErrEll	ErrEll	ErrEll	ErrEll	ErrEll	ErrEll	ErrEll	ErrEll	ErrEll	ErrEll	ErrEll	ErrEll	ErrEll	ErrEll	ErrEll	ErrEll	ErrEll
		5.483	0.3458	ConcTikEll	ConcTikEll	ConcTikEll	ConcTikEll	ConcTikEll	ConcTikEll	ConcTikEll	ConcTikEll	ConcTikEll	ConcTikEll			5.93119	0.357269
		5.346	0.3367													5.45159	0.341999
		5.389	0.3397													5.00517	0.326902
		5.347	0.336													4.58965	0.311974
		5.246	0.3296													4.20288	0.297214
		5.264	0.3377													3.84287	0.28262
		4.599	0.2912													3.50777	0.268191
		5.252	0.331													3.19585	0.253923
		5.083	0.3233													2.90552	0.239817
		5.312	0.3344													2.63528	0.225868
		5.308	0.3329													2.38374	0.212077
		5.245	0.3294													2.14961	0.198441
		0.544	0.0675													1.93167	0.184959
		0.634	0.0701													1.72882	0.171628
		0.909	0.0887													1.54	0.158447
		2.04	0.1572													1.36424	0.145414
		1.79	0.1365													1.20065	0.132528
		1.97	0.1444													1.04838	0.119787
		2.28	0.162													0.906642	0.107189
		2.307	0.1674													0.774713	0.0947335
		1.087	0.0979													0.651913	0.0824176
		2.95	0.2055													0.53761	0.0702403
		3.197	0.2149													0.431216	0.0582
		3.406	0.2225													0.332184	0.0462951
		4.43	0.2916													0.240004	0.0345242
		3.85	0.2478													0.154203	0.0228857
		4.215	0.2737													0.0743382	0.0113781
		4.421	0.2852													0	0
		2.986	0.1934													0	0
		4.357	0.2765													ConcBand	ConcBand
		4.08	0.2552
		IsoLine	IsoLine
[truncated: 104 more columns]

[truncated: 5 more sheets: PlotDat9, PlotDat3, PlotDat14, PlotDat6, compiled]
